# Supplementary material for: Unraveling the molecular pathobiology of vocal fold systemic dehydration using an in vivo rabbit model
Source: PubMed Central journal article supplement (PMC7394397; doi:10.1371/journal.pone.0236348), 2020-07-31
Supplement: pone.0236348.s002.pdf [file pone.0236348.s002.pdf]

**S1 Table. Summary of pairwise analysis of hematologic analytes as markers of systemic dehydration.**

| Blood analyte                  | % change in the blood<br>(mean $\pm$ SEM) |                     | Mann-Whitney<br>p-value* |
|--------------------------------|-------------------------------------------|---------------------|--------------------------|
|                                | Control<br>(N=6)                          | Dehydrated<br>(N=8) |                          |
| PCV                            | -0.09 $\pm$ 1.26                          | 15.64 $\pm$ 1.74    | 0.0003                   |
| TPP                            | -0.27 $\pm$ 1.66                          | 16.27 $\pm$ 1.92    | 0.0003                   |
| <b>iSTAT Chem8+</b> Creatinine | 7.01 $\pm$ 3.22                           | 49.44 $\pm$ 7.78    | 0.0013                   |
| BUN                            | 27.27 $\pm$ 4.45                          | 64.33 $\pm$ 8.46    | 0.0023                   |
| Glucose                        | 1.15 $\pm$ 4.46                           | 32.23 $\pm$ 10.02   | 0.0593                   |
| Sodium                         | 1.08 $\pm$ 0.75                           | -1.32 $\pm$ 0.50    | 0.0273                   |
| Chloride                       | 3.00 $\pm$ 1.54                           | -4.82 $\pm$ 1.53    | 0.008                    |
| Potassium                      | -4.50 $\pm$ 2.36                          | -11.60 $\pm$ 2.79   | 0.2393; ns               |
| Total CO <sub>2</sub>          | 3.42 $\pm$ 9.34                           | 15.09 $\pm$ 15.57   | 0.9760; ns               |
| iCa                            | -0.21 $\pm$ 3.76                          | -6.86 $\pm$ 2.00    | 0.2671; ns               |
| Anion gap                      | -4.03 $\pm$ 10.89                         | 3.58 $\pm$ 4.99     | 0.2684; ns               |
| Hematocrit                     | -2.05 $\pm$ 1.49                          | 14.77 $\pm$ 1.52    | 0.0003                   |
| Hemoglobin                     | -2.05 $\pm$ 1.45                          | 14.73 $\pm$ 1.53    | 0.0003                   |

PCV: packed cell volume; TPP: total plasma protein; BUN: blood urea nitrogen; iCa: ionized calcium

\*Exact p-value: differences between control and dehydrated group are statistically significant when  $p \leq 0.05$ .

ns: non-significant
