# Supplementary material for: Unraveling the molecular pathobiology of vocal fold systemic dehydration using an in vivo rabbit model
Source: PubMed Central journal article supplement (PMC7394397; doi:10.1371/journal.pone.0236348), 2020-07-31
Supplement: pone.0236348.s003.pdf [file pone.0236348.s003.pdf]

**S2 Table. Statistics of quality and mapping of the reads generated by RNA-Seq of vocal fold samples.**

| Sample ID                  | Total Read Pairs | Quality Control Read Pairs |       | Total Mapped Read Pairs (based on quality control read pairs) |       | Uniquely Mapped Read Pairs (based on quality control read pairs) |       | Read pairs went into genes (based on total mapped read pairs) |       |
|----------------------------|------------------|----------------------------|-------|---------------------------------------------------------------|-------|------------------------------------------------------------------|-------|---------------------------------------------------------------|-------|
|                            |                  | Number                     | %     | Number                                                        | %     | Number                                                           | %     | Number                                                        | %     |
| Rabbit 240 (12) control    | 66143667         | 66100178                   | 99.93 | 58522126                                                      | 88.54 | 53663767                                                         | 81.19 | 42496048                                                      | 72.62 |
| Rabbit 869 (14) control    | 107755671        | 107687037                  | 99.94 | 95434601                                                      | 88.62 | 79169746                                                         | 73.52 | 62129681                                                      | 65.10 |
| Rabbit 964 (17) control    | 87408450         | 87352548                   | 99.94 | 79773825                                                      | 91.32 | 72736548                                                         | 83.27 | 57458318                                                      | 72.03 |
| Rabbit 921 (21) control    | 125274050        | 125183809                  | 99.93 | 111966040                                                     | 89.44 | 89676470                                                         | 71.64 | 69670859                                                      | 62.22 |
| Rabbit 239 (13) dehydrated | 84204744         | 84139472                   | 99.92 | 74056563                                                      | 88.02 | 69002208                                                         | 82.01 | 54560066                                                      | 73.67 |
| Rabbit 963 (15) dehydrated | 75775868         | 75723442                   | 99.93 | 67942599                                                      | 89.72 | 61779793                                                         | 81.59 | 49590267                                                      | 72.99 |
| Rabbit 875 (16) dehydrated | 99267239         | 99197774                   | 99.93 | 90013349                                                      | 90.74 | 81684791                                                         | 82.35 | 64672009                                                      | 71.85 |
| Rabbit 876 (18) dehydrated | 64259345         | 64213401                   | 99.93 | 57827885                                                      | 90.06 | 49691359                                                         | 77.38 | 39039165                                                      | 67.51 |
| Rabbit 919 (19) dehydrated | 78974509         | 78923352                   | 99.94 | 71586258                                                      | 90.70 | 58774914                                                         | 74.47 | 45847047                                                      | 64.04 |
| Rabbit 922 (22) dehydrated | 117741119        | 117634905                  | 99.91 | 105735235                                                     | 89.88 | 85466835                                                         | 72.65 | 66666313                                                      | 63.05 |
