# Supplementary material for: Unraveling the molecular pathobiology of vocal fold systemic dehydration using an in vivo rabbit model
Source: PubMed Central journal article supplement (PMC7394397; doi:10.1371/journal.pone.0236348), 2020-07-31
Supplement: pone.0236348.s004.pdf [file pone.0236348.s004.pdf]

**S3 Table. Differential expression analysis between control and dehydrated vocal fold samples using Cufflinks.**

| Ensembl gene ID     | Sample_1 | Sample_2   | log2fold |         |          | q-value | Gene symbol      | Description                                                                                                                       |
|---------------------|----------|------------|----------|---------|----------|---------|------------------|-----------------------------------------------------------------------------------------------------------------------------------|
|                     |          |            | Value_1  | Value_2 | change   |         |                  |                                                                                                                                   |
| ENSOCUG00000000197  | Control  | Dehydrated | 26.1764  | 62.0782 | 1.24582  | 0.00669 | <i>HK2</i>       | hexokinase 2 [Source:NCBI gene;Acc:100338214]                                                                                     |
| ENSOCUG00000000737  | Control  | Dehydrated | 3.34009  | 79.3614 | 4.57048  | 0.00669 | <i>NR4A3</i>     | nuclear receptor subfamily 4 group A member 3 [Source:NCBI gene;Acc:100344785]                                                    |
| ENSOCUG00000000786  | Control  | Dehydrated | 25.9838  | 11.9905 | -1.11572 | 0.00669 | <i>EPHA2</i>     | EPH receptor A2 [Source:HGNC Symbol;Acc:HGNC:3386]                                                                                |
| ENSOCUG00000001054  | Control  | Dehydrated | 27.8884  | 13.1614 | -1.08335 | 0.00669 | <i>GLTP</i>      | glycolipid transfer protein [Source:NCBI gene;Acc:100347859]                                                                      |
| ENSOCUG00000001114  | Control  | Dehydrated | 21.3102  | 2.67637 | -2.99319 | 0.00669 | <i>TGM3</i>      | transglutaminase 3 [Source:NCBI gene;Acc:100351990]                                                                               |
| ENSOCUG00000001230  | Control  | Dehydrated | 13.3655  | 5.13995 | -1.37869 | 0.00669 | <i>XDH</i>       | xanthine dehydrogenase [Source:NCBI gene;Acc:100144327]                                                                           |
| ENSOCUG00000001484  | Control  | Dehydrated | 0        | 0.78568 | #NUM!    | 0.00669 | <i>IMPG1</i>     | interphotoreceptor matrix proteoglycan 1 [Source:HGNC Symbol;Acc:HGNC:6055]                                                       |
| ENSOCUG00000001869  | Control  | Dehydrated | 119.62   | 42.3207 | -1.49903 | 0.00669 |                  | unknown                                                                                                                           |
| ENSOCUG00000002341  | Control  | Dehydrated | 42.3336  | 20.2418 | -1.06447 | 0.00669 | <i>CAPG</i>      | capping actin protein, gelsolin like [Source:NCBI gene;Acc:100347131]                                                             |
| ENSOCUG00000002371  | Control  | Dehydrated | 13.8412  | 4.21578 | -1.7151  | 0.00669 | <i>SYTL1</i>     | synaptotagmin like 1 [Source:NCBI gene;Acc:100343322]                                                                             |
| ENSOCUG00000002424  | Control  | Dehydrated | 240.562  | 63.8756 | -1.91307 | 0.00669 |                  | Serum amyloid A protein                                                                                                           |
| ENSOCUG00000002745  | Control  | Dehydrated | 546.658  | 167.601 | -1.70561 | 0.00669 | <i>S100A14</i>   | S100 calcium binding protein A14 [Source:NCBI gene;Acc:100345947]                                                                 |
| ENSOCUG00000002944  | Control  | Dehydrated | 6.54943  | 1.49599 | -2.13027 | 0.00669 | <i>SLC34A2</i>   | solute carrier family 34 member 2 [Source:NCBI gene;Acc:100345994]                                                                |
| ENSOCUG00000003577  | Control  | Dehydrated | 706.831  | 92.642  | -2.93163 | 0.00669 | <i>SCGB1D1</i>   | Oryctolagus cuniculus lipophilin AL (LOC100008792), mRNA. [Source:RefSeq mRNA;Acc:NM_001082092]                                   |
| ENSOCUG000000004161 | Control  | Dehydrated | 144.818  | 58.7065 | -1.30264 | 0.00669 | <i>IL1RN</i>     | interleukin 1 receptor antagonist [Source:NCBI gene;Acc:100009558]                                                                |
| ENSOCUG000000004625 | Control  | Dehydrated | 212.308  | 52.6072 | -2.01282 | 0.00669 | <i>ORM1</i>      | Oryctolagus cuniculus orosomucoid 1 (ORM1), mRNA. [Source:RefSeq mRNA;Acc:NM_001101695]                                           |
| ENSOCUG000000004655 | Control  | Dehydrated | 49.0482  | 21.6419 | -1.18037 | 0.00669 | <i>CYP2B4</i>    | Oryctolagus cuniculus cytochrome P450, family 2, subfamily b, polypeptide 4 (CYP2B4), mRNA. [Source:RefSeq mRNA;Acc:NM_001170859] |
| ENSOCUG000000004918 | Control  | Dehydrated | 166.211  | 78.4839 | -1.08255 | 0.00669 | <i>FAM129B</i>   | family with sequence similarity 129 member B [Source:HGNC Symbol;Acc:HGNC:25282]                                                  |
| ENSOCUG000000005107 | Control  | Dehydrated | 607.98   | 231.176 | -1.39503 | 0.00669 | <i>HOPX</i>      | HOP homeobox [Source:NCBI gene;Acc:100037714]                                                                                     |
| ENSOCUG000000005202 | Control  | Dehydrated | 1391.02  | 603.28  | -1.20525 | 0.00669 | <i>S100A11</i>   | S100 calcium binding protein A11 [Source:NCBI gene;Acc:100008975]                                                                 |
| ENSOCUG000000005417 | Control  | Dehydrated | 53.7176  | 9.70867 | -2.46805 | 0.00669 | <i>TMPRSS11B</i> | transmembrane serine protease 11B [Source:HGNC Symbol;Acc:HGNC:25398]                                                             |
| ENSOCUG000000005634 | Control  | Dehydrated | 103.252  | 42.3821 | -1.28465 | 0.00669 | <i>RAB25</i>     | RAB25, member RAS oncogene family [Source:NCBI gene;Acc:100009059]                                                                |
| ENSOCUG000000006251 | Control  | Dehydrated | 37.262   | 15.9761 | -1.22178 | 0.00669 | <i>EPHX2</i>     | epoxide hydrolase 2 [Source:NCBI gene;Acc:100350230]                                                                              |
| ENSOCUG000000006275 | Control  | Dehydrated | 95.9433  | 11.9006 | -3.01114 | 0.00669 | <i>PIP</i>       | prolactin induced protein [Source:NCBI gene;Acc:100328927]                                                                        |
| ENSOCUG000000006280 | Control  | Dehydrated | 55.2567  | 15.2969 | -1.85291 | 0.00669 | <i>CDSN</i>      | corneodesmosin [Source:NCBI gene;Acc:100338321]                                                                                   |
| ENSOCUG000000006405 | Control  | Dehydrated | 339.327  | 118.694 | -1.51542 | 0.00669 | <i>SFN</i>       | stratifin [Source:NCBI gene;Acc:100358179]                                                                                        |
| ENSOCUG000000006494 | Control  | Dehydrated | 51.0985  | 12.555  | -2.02502 | 0.00669 | <i>CNFN</i>      | cornifelin [Source:NCBI gene;Acc:100357018]                                                                                       |
| ENSOCUG000000006833 | Control  | Dehydrated | 0.27511  | 1.1773  | 2.09742  | 0.00669 | <i>DNAH12</i>    | dynein axonemal heavy chain 12 [Source:NCBI gene;Acc:100353849]                                                                   |
| ENSOCUG000000007586 | Control  | Dehydrated | 0.7856   | 2.89332 | 1.88085  | 0.00669 | <i>SPAG17</i>    | sperm associated antigen 17 [Source:NCBI gene;Acc:100353938]                                                                      |
| ENSOCUG000000007730 | Control  | Dehydrated | 30.5061  | 13.3434 | -1.19297 | 0.00669 | <i>LAD1</i>      | ladinin 1 [Source:NCBI gene;Acc:100343996]                                                                                        |
| ENSOCUG000000007958 | Control  | Dehydrated | 393.099  | 132.669 | -1.56706 | 0.00669 | <i>LY6G6C</i>    | lymphocyte antigen 6 family member G6C [Source:NCBI gene;Acc:100351585]                                                           |
| ENSOCUG000000008632 | Control  | Dehydrated | 497.168  | 74.9568 | -2.72796 | 0.00669 | <i>S100A9</i>    | S100 calcium binding protein A9 [Source:NCBI gene;Acc:100008704]                                                                  |
| ENSOCUG000000008689 | Control  | Dehydrated | 129.389  | 48.6895 | -1.41003 | 0.00669 | <i>CEACAM1</i>   | carcinoembryonic antigen related cell adhesion molecule 1 [Source:NCBI gene;Acc:100351299]                                        |
| ENSOCUG000000008771 | Control  | Dehydrated | 3.13206  | 0.85715 | -1.8695  | 0.00669 | <i>IL1A</i>      | interleukin 1 alpha [Source:NCBI gene;Acc:100009250]                                                                              |
| ENSOCUG000000008779 | Control  | Dehydrated | 120.781  | 43.8849 | -1.4606  | 0.00669 | <i>SPINK5</i>    | serine peptidase inhibitor, Kazal type 5 [Source:NCBI gene;Acc:100337963]                                                         |
| ENSOCUG000000008818 | Control  | Dehydrated | 152.436  | 67.0454 | -1.18499 | 0.00669 | <i>CKB</i>       | Oryctolagus cuniculus creatine kinase B (CKB), mRNA. [Source:RefSeq mRNA;Acc:NM_001082261]                                        |
| ENSOCUG000000009148 | Control  | Dehydrated | 93.7372  | 40.0405 | -1.22716 | 0.00669 | <i>SERPINB11</i> | serpin family B member 11 [Source:NCBI gene;Acc:100328646]                                                                        |
| ENSOCUG000000009909 | Control  | Dehydrated | 22.6676  | 8.19033 | -1.46864 | 0.00669 | <i>PHYHIP</i>    | phytanoyl-CoA 2-hydroxylase interacting protein [Source:HGNC Symbol;Acc:HGNC:16865]                                               |
| ENSOCUG000000010144 | Control  | Dehydrated | 15.6273  | 4.7022  | -1.73266 | 0.00669 | <i>TTC22</i>     | tetratricopeptide repeat domain 22 [Source:NCBI gene;Acc:100339658]                                                               |
| ENSOCUG000000010205 | Control  | Dehydrated | 0.98022  | 4.77708 | 2.28495  | 0.00669 | <i>DNAH5</i>     | dynein axonemal heavy chain 5 [Source:HGNC Symbol;Acc:HGNC:2950]                                                                  |
| ENSOCUG000000010425 | Control  | Dehydrated | 79.5537  | 25.9732 | -1.61491 | 0.00669 | <i>FABP5</i>     | fatty acid binding protein 5 [Source:NCBI gene;Acc:100345743]                                                                     |
| ENSOCUG000000010458 | Control  | Dehydrated | 34.4903  | 15.4461 | -1.15895 | 0.00669 | <i>NECTIN1</i>   | nectin cell adhesion molecule 1 [Source:NCBI gene;Acc:100341399]                                                                  |
| ENSOCUG000000010912 | Control  | Dehydrated | 18.0226  | 1.48383 | -3.60241 | 0.00669 | <i>KRTDAP</i>    | keratinocyte differentiation associated protein [Source:NCBI gene;Acc:103345425]                                                  |
| ENSOCUG000000010917 | Control  | Dehydrated | 90.2615  | 24.1113 | -1.9044  | 0.00669 | <i>SBSN</i>      | suprabasin [Source:NCBI gene;Acc:100346157]                                                                                       |
| ENSOCUG000000010998 | Control  | Dehydrated | 45.8753  | 16.9615 | -1.43546 | 0.00669 | <i>IL36RN</i>    | interleukin 36 receptor antagonist [Source:NCBI gene;Acc:100340988]                                                               |
| ENSOCUG000000011082 | Control  | Dehydrated | 30.6903  | 11.963  | -1.35921 | 0.00669 | <i>EPHA1</i>     | EPH receptor A1 [Source:NCBI gene;Acc:100338483]                                                                                  |
| ENSOCUG000000011658 | Control  | Dehydrated | 135.065  | 39.8046 | -1.76265 | 0.00669 | <i>NCCRP1</i>    | non-specific cytotoxic cell receptor protein 1 homolog (zebrafish) [Source:NCBI gene;Acc:100357987]                               |
| ENSOCUG000000012584 | Control  | Dehydrated | 254.713  | 31.5589 | -3.01275 | 0.00669 | <i>CA6</i>       | carbonic anhydrase 6 [Source:NCBI gene;Acc:100358016]                                                                             |
| ENSOCUG000000012774 | Control  | Dehydrated | 1666.9   | 500.219 | -1.73654 | 0.00669 | <i>KRT4</i>      | keratin 4 [Source:NCBI gene;Acc:100348388]                                                                                        |
| ENSOCUG000000012899 | Control  | Dehydrated | 21.178   | 7.61089 | -1.47643 | 0.00669 | <i>TMEM79</i>    | transmembrane protein 79 [Source:NCBI gene;Acc:100338752]                                                                         |
| ENSOCUG000000013020 | Control  | Dehydrated | 6.77975  | 1.74256 | -1.96002 | 0.00669 | <i>ADGRF4</i>    | adhesion G protein-coupled receptor F4 [Source:NCBI gene;Acc:100352009]                                                           |

|                    |         |            |         |         |          |         |                     |                                                                                                  |
|--------------------|---------|------------|---------|---------|----------|---------|---------------------|--------------------------------------------------------------------------------------------------|
| ENSOCUG00000013357 | Control | Dehydrated | 29.7291 | 11.4328 | -1.37869 | 0.00669 | <i>GRHL3</i>        | grainyhead like transcription factor 3 [Source:NCBI gene;Acc:100356381]                          |
| ENSOCUG00000013564 | Control | Dehydrated | 35.9598 | 72.2798 | 1.00721  | 0.00669 | <i>TRIM63</i>       | tripartite motif containing 63 [Source:NCBI gene;Acc:100347164]                                  |
| ENSOCUG00000013593 | Control | Dehydrated | 0.14013 | 2.74882 | 4.29401  | 0.00669 | <i>BPI</i>          | bactericidal/permeability-increasing protein [Source:NCBI gene;Acc:100009228]                    |
| ENSOCUG00000013647 | Control | Dehydrated | 7.16528 | 15.6833 | 1.13014  | 0.00669 | <i>SORBS1</i>       | sorbin and SH3 domain containing 1 [Source:HGNC Symbol;Acc:HGNC:14565]                           |
| ENSOCUG00000013779 | Control | Dehydrated | 2.12019 | 0.33712 | -2.65288 | 0.00669 | <i>FOXN1</i>        | forkhead box N1 [Source:NCBI gene;Acc:100346912]                                                 |
| ENSOCUG00000013920 | Control | Dehydrated | 38.6763 | 12.8837 | -1.58591 | 0.00669 | <i>KRT80</i>        | keratin 80 [Source:NCBI gene;Acc:100350733]                                                      |
| ENSOCUG00000014012 | Control | Dehydrated | 1.3603  | 0.11171 | -3.60608 | 0.00669 | <i>A2ML1</i>        | alpha-2-macroglobulin like 1 [Source:NCBI gene;Acc:100347314]                                    |
| ENSOCUG00000014227 | Control | Dehydrated | 12.7416 | 65.9219 | 2.37121  | 0.00669 | <i>SEC14L3</i>      | SEC14 like lipid binding 3 [Source:NCBI gene;Acc:100354633]                                      |
| ENSOCUG00000014346 | Control | Dehydrated | 29.3871 | 11.9385 | -1.29956 | 0.00669 | <i>C1orf116</i>     | chromosome 1 open reading frame 116 [Source:HGNC Symbol;Acc:HGNC:28667]                          |
| ENSOCUG00000014485 | Control | Dehydrated | 29.0944 | 12.9783 | -1.16464 | 0.00669 | <i>SPTBN2</i>       | spectrin beta, non-erythrocytic 2 [Source:HGNC Symbol;Acc:HGNC:11276]                            |
| ENSOCUG00000014548 | Control | Dehydrated | 52.0048 | 21.5268 | -1.27251 | 0.00669 | <i>EVPL</i>         | envoplakin [Source:HGNC Symbol;Acc:HGNC:3503]                                                    |
| ENSOCUG00000014668 | Control | Dehydrated | 6.84859 | 41.6114 | 2.6031   | 0.00669 | <i>PPARGCIA</i>     | PPARG coactivator 1 alpha [Source:NCBI gene;Acc:100349219]                                       |
| ENSOCUG00000014998 | Control | Dehydrated | 157.569 | 54.0335 | -1.54406 | 0.00669 | <i>IL36A</i>        | interleukin 36 alpha [Source:NCBI gene;Acc:100355520]                                            |
| ENSOCUG00000015518 | Control | Dehydrated | 0       | 24.9291 | #NUM!    | 0.00669 | <i>CAMP</i>         | cathelicidin antimicrobial peptide [Source:NCBI gene;Acc:100009142]                              |
| ENSOCUG00000015772 | Control | Dehydrated | 33.7438 | 10.271  | -1.71605 | 0.00669 | <i>CHI3L2</i>       | chitinase-3-like protein 2 [Source:NCBI gene;Acc:100352595]                                      |
| ENSOCUG00000016068 | Control | Dehydrated | 3.57609 | 12.4972 | 1.80515  | 0.00669 | <i>SERPINE1</i>     | serpin family E member 1 [Source:NCBI gene;Acc:100009588]                                        |
| ENSOCUG00000016317 | Control | Dehydrated | 0.4669  | 1.72851 | 1.88834  | 0.00669 | <i>CFAP44</i>       | cilia and flagella associated protein 44 [Source:NCBI gene;Acc:100348161]                        |
| ENSOCUG00000016657 | Control | Dehydrated | 0       | 1.71401 | #NUM!    | 0.00669 | <i>EIF5A2</i>       | eukaryotic translation initiation factor 5A2 [Source:NCBI gene;Acc:100355062]                    |
| ENSOCUG00000017034 | Control | Dehydrated | 6.26576 | 11.7981 | 0.912993 | 0.00669 | <i>REV3L</i>        | REV3 like, DNA directed polymerase zeta catalytic subunit [Source:NCBI gene;Acc:100359215]       |
| ENSOCUG00000017247 | Control | Dehydrated | 4.91137 | 1.87862 | -1.38645 | 0.00669 | <i>CYP4F22</i>      | cytochrome P450 family 4 subfamily F member 22 [Source:HGNC Symbol;Acc:HGNC:26820]               |
| ENSOCUG00000017694 | Control | Dehydrated | 77.815  | 27.3311 | -1.50951 | 0.00669 | <i>KRT23</i>        | keratin 23 [Source:NCBI gene;Acc:100358195]                                                      |
| ENSOCUG00000017717 | Control | Dehydrated | 30.1558 | 12.6487 | -1.25344 | 0.00669 | <i>GRHL1</i>        | grainyhead like transcription factor 1 [Source:NCBI gene;Acc:100352813]                          |
| ENSOCUG00000021242 | Control | Dehydrated | 69.6692 | 28.8321 | -1.27285 | 0.00669 | <i>PKP1</i>         | plakophilin 1 [Source:NCBI gene;Acc:100338080]                                                   |
| ENSOCUG00000021361 | Control | Dehydrated | 78.1115 | 33.6563 | -1.21466 | 0.00669 | <i>PDLIM2</i>       | PDZ and LIM domain 2 [Source:NCBI gene;Acc:100353069]                                            |
| ENSOCUG00000021508 | Control | Dehydrated | 13.7633 | 6.1062  | -1.17248 | 0.00669 | <i>INAVA</i>        | innate immunity activator [Source:NCBI gene;Acc:100357252]                                       |
| ENSOCUG00000022335 | Control | Dehydrated | 0       | 13.0699 | #NUM!    | 0.00669 |                     | Oryctolagus cuniculus defensin NP-3a (LOC100009134), mRNA. [Source:RefSeq mRNA;Acc:NM_001082298] |
| ENSOCUG00000022365 | Control | Dehydrated | 0       | 0.30161 | #NUM!    | 0.00669 |                     | unknown                                                                                          |
| ENSOCUG00000022549 | Control | Dehydrated | 36.101  | 15.6826 | -1.20288 | 0.00669 | <i>LOC100344499</i> | transmembrane protease serine 11G [Source:NCBI gene;Acc:100344499]                               |
| ENSOCUG00000022624 | Control | Dehydrated | 23.6539 | 10.0823 | -1.23025 | 0.00669 | <i>SLC26A9</i>      | solute carrier family 26 member 9 [Source:NCBI gene;Acc:100346998]                               |
| ENSOCUG00000022645 | Control | Dehydrated | 0       | 0.67279 | #NUM!    | 0.00669 | <i>HPCAL4</i>       | hippocalcin like 4 [Source:NCBI gene;Acc:100340413]                                              |
| ENSOCUG00000022646 | Control | Dehydrated | 1584.74 | 213.426 | -2.89244 | 0.00669 | <i>S100A12</i>      | S100 calcium binding protein A12 [Source:NCBI gene;Acc:100008703]                                |
| ENSOCUG00000023409 | Control | Dehydrated | 14.7718 | 6.15363 | -1.26333 | 0.00669 | <i>RAPGEFL1</i>     | Rap guanine nucleotide exchange factor like 1 [Source:NCBI gene;Acc:100357164]                   |
| ENSOCUG00000023739 | Control | Dehydrated | 0.56353 | 3.86236 | 2.77692  | 0.00669 | <i>AICDA</i>        | activation induced cytidine deaminase [Source:HGNC Symbol;Acc:HGNC:13203]                        |
| ENSOCUG00000023878 | Control | Dehydrated | 2.48735 | 5.64879 | 1.18333  | 0.00669 | <i>SYNE1</i>        | spectrin repeat containing nuclear envelope protein 1 [Source:HGNC Symbol;Acc:HGNC:17089]        |
| ENSOCUG00000024096 | Control | Dehydrated | 3190.28 | 1206.24 | -1.40317 | 0.00669 | <i>S100A6</i>       | S100 calcium binding protein A6 [Source:NCBI gene;Acc:100348755]                                 |
| ENSOCUG00000024745 | Control | Dehydrated | 15.3644 | 4.16122 | -1.88451 | 0.00669 | <i>TMPRSS11D</i>    | transmembrane serine protease 11D [Source:HGNC Symbol;Acc:HGNC:24059]                            |
| ENSOCUG00000025291 | Control | Dehydrated | 26.5049 | 10.874  | -1.28537 | 0.00669 | <i>ST6GALNAC1</i>   | ST6 N-acetylgalactosaminide alpha-2,6-sialyltransferase 1 [Source:NCBI gene;Acc:100357022]       |
| ENSOCUG00000025736 | Control | Dehydrated | 28.0558 | 9.22162 | -1.60521 | 0.00669 | <i>APOBEC1</i>      | apolipoprotein B mRNA editing enzyme catalytic subunit 1 [Source:NCBI gene;Acc:100009191]        |
| ENSOCUG00000025810 | Control | Dehydrated | 9.49417 | 1.13238 | -3.06768 | 0.00669 | <i>TGM7</i>         | transglutaminase 7 [Source:HGNC Symbol;Acc:HGNC:30790]                                           |
| ENSOCUG00000025956 | Control | Dehydrated | 258.578 | 117.933 | -1.13263 | 0.00669 | <i>SDC1</i>         | syndecan 1 [Source:NCBI gene;Acc:100338470]                                                      |
| ENSOCUG00000025990 | Control | Dehydrated | 44.6719 | 16.6673 | -1.42235 | 0.00669 | <i>PRSS27</i>       | serine protease 27 [Source:HGNC Symbol;Acc:HGNC:15475]                                           |
| ENSOCUG00000026264 | Control | Dehydrated | 76.459  | 23.7326 | -1.68782 | 0.00669 | <i>KLK13</i>        | kallikrein related peptidase 13 [Source:HGNC Symbol;Acc:HGNC:6361]                               |
| ENSOCUG00000026334 | Control | Dehydrated | 17.4692 | 7.42184 | -1.23496 | 0.00669 | <i>GNPMB</i>        | glycoprotein nmb [Source:NCBI gene;Acc:100350570]                                                |
| ENSOCUG00000026555 | Control | Dehydrated | 20.2356 | 7.54576 | -1.42316 | 0.00669 |                     | unknown                                                                                          |
| ENSOCUG00000027050 | Control | Dehydrated | 166.023 | 54.9554 | -1.59505 | 0.00669 | <i>LYPD3</i>        | LY6/PLAUR domain containing 3 [Source:HGNC Symbol;Acc:HGNC:24880]                                |
| ENSOCUG00000027593 | Control | Dehydrated | 25.0858 | 4.54919 | -2.46319 | 0.00669 | <i>PSORS1C2</i>     | psoriasis susceptibility 1 candidate 2 [Source:NCBI gene;Acc:100348579]                          |
| ENSOCUG00000027838 | Control | Dehydrated | 63.9199 | 20.1785 | -1.66345 | 0.00669 | <i>LOC100356345</i> | fatty acid desaturase 2-like protein FADS2P1 [Source:NCBI gene;Acc:100356345]                    |
| ENSOCUG00000028107 | Control | Dehydrated | 88.6987 | 34.5292 | -1.3611  | 0.00669 |                     | unknown                                                                                          |
| ENSOCUG00000029153 | Control | Dehydrated | 11.1174 | 4.79523 | -1.21314 | 0.00669 | <i>CDH3</i>         | cadherin 3 [Source:NCBI gene;Acc:100356285]                                                      |
| ENSOCUG00000029216 | Control | Dehydrated | 24.6297 | 6.42315 | -1.93905 | 0.00669 | <i>C17H15orf48</i>  | chromosome 17 open reading frame, human C15orf48 [Source:NCBI gene;Acc:103351114]                |
| ENSOCUG00000029244 | Control | Dehydrated | 59.6833 | 19.0435 | -1.64803 | 0.00669 | <i>KRT14</i>        | keratin, type I cytoskeletal 14 [Source:NCBI gene;Acc:100344686]                                 |
| ENSOCUG00000029278 | Control | Dehydrated | 202.155 | 69.1059 | -1.54858 | 0.00669 | <i>KRT78</i>        | keratin 78 [Source:NCBI gene;Acc:100353913]                                                      |
| ENSOCUG00000029281 | Control | Dehydrated | 0.58329 | 2.94903 | 2.33796  | 0.00669 | <i>LOC103351523</i> | C-C motif chemokine 15 [Source:NCBI gene;Acc:103351523]                                          |
| ENSOCUG00000029569 | Control | Dehydrated | 18.9891 | 4.0783  | -2.21913 | 0.00669 | <i>KRT17</i>        | keratin 17 [Source:NCBI gene;Acc:100344942]                                                      |

|                     |         |            |         |         |          |         |                     |                                                                                             |
|---------------------|---------|------------|---------|---------|----------|---------|---------------------|---------------------------------------------------------------------------------------------|
| ENSOCUG00000029663  | Control | Dehydrated | 2.13631 | 0.40444 | -2.40112 | 0.00669 | <i>KRT1</i>         | keratin 1 [Source:NCBI gene;Acc:100353415]                                                  |
| ENSOCUG00000003200  | Control | Dehydrated | 4.36785 | 13.9145 | 1.67159  | 0.01171 | <i>VGLL2</i>        | vestigial like family member 2 [Source:NCBI gene;Acc:100347411]                             |
| ENSOCUG00000003467  | Control | Dehydrated | 539.436 | 210.897 | -1.35492 | 0.01171 | <i>PSCA</i>         | prostate stem cell antigen [Source:NCBI gene;Acc:100344297]                                 |
| ENSOCUG00000003544  | Control | Dehydrated | 140.491 | 46.738  | -1.58781 | 0.01171 | <i>MAL</i>          | mal, T cell differentiation protein [Source:HGNC Symbol;Acc:HGNC:6817]                      |
| ENSOCUG00000004459  | Control | Dehydrated | 10.5338 | 25.4794 | 1.2743   | 0.01171 | <i>CCNA1</i>        | potassium voltage-gated channel subfamily A member 1 [Source:NCBI gene;Acc:100037722]       |
| ENSOCUG00000004644  | Control | Dehydrated | 12.423  | 6.03092 | -1.04257 | 0.01171 | <i>KCDC120</i>      | coiled-coil domain containing 120 [Source:HGNC Symbol;Acc:HGNC:28910]                       |
| ENSOCUG00000004852  | Control | Dehydrated | 213.277 | 94.2682 | -1.17789 | 0.01171 | <i>MALL</i>         | mal, T cell differentiation protein like [Source:NCBI gene;Acc:100351475]                   |
| ENSOCUG00000006463  | Control | Dehydrated | 19.103  | 40.2003 | 1.0734   | 0.01171 | <i>PRKAG2</i>       | protein kinase AMP-activated non-catalytic subunit gamma 2 [Source:NCBI gene;Acc:100353180] |
| ENSOCUG00000008947  | Control | Dehydrated | 117.217 | 60.6217 | -0.95127 | 0.01171 | <i>MARCKSL1</i>     | MARCKS like 1 [Source:HGNC Symbol;Acc:HGNC:7142]                                            |
| ENSOCUG00000009682  | Control | Dehydrated | 6.45172 | 2.16235 | -1.57708 | 0.01171 | <i>GSDMA</i>        | gasdermin A [Source:NCBI gene;Acc:100356912]                                                |
| ENSOCUG00000010529  | Control | Dehydrated | 16.7409 | 2.75603 | -2.60271 | 0.01171 | <i>LOC100339150</i> | serpin B4 [Source:NCBI gene;Acc:100339150]                                                  |
| ENSOCUG00000011298  | Control | Dehydrated | 49.6029 | 20.6927 | -1.2613  | 0.01171 | <i>FAM83D</i>       | family with sequence similarity 83 member D [Source:NCBI gene;Acc:100339633]                |
| ENSOCUG00000011786  | Control | Dehydrated | 65.842  | 30.47   | -1.11162 | 0.01171 | <i>ECM1</i>         | extracellular matrix protein 1 [Source:NCBI gene;Acc:100338579]                             |
| ENSOCUG00000012592  | Control | Dehydrated | 20.0058 | 40.4554 | 1.01591  | 0.01171 | <i>ASB5</i>         | ankyrin repeat and SOCS box containing 5 [Source:NCBI gene;Acc:100302410]                   |
| ENSOCUG00000028041  | Control | Dehydrated | 23.1684 | 9.72546 | -1.25232 | 0.01171 | <i>LOC100341802</i> | UDP-glucuronosyltransferase 2B31 [Source:NCBI gene;Acc:100341802]                           |
| ENSOCUG00000029190  | Control | Dehydrated | 34.2429 | 16.6478 | -1.04048 | 0.01171 | <i>PLAC8</i>        | placenta specific 8 [Source:NCBI gene;Acc:100340512]                                        |
| ENSOCUG00000004238  | Control | Dehydrated | 337.158 | 174.948 | -0.9465  | 0.01599 | <i>PERP</i>         | PERP, TP53 apoptosis effector [Source:NCBI gene;Acc:100350501]                              |
| ENSOCUG00000008694  | Control | Dehydrated | 5.28062 | 12.9526 | 1.29446  | 0.01599 | <i>DNAJC12</i>      | DnaJ heat shock protein family (Hsp40) member C12 [Source:NCBI gene;Acc:100349695]          |
| ENSOCUG000000011201 | Control | Dehydrated | 237.243 | 104.496 | -1.18291 | 0.01599 | <i>CYP4B1</i>       | CYP4B1-like isozyme short form [Source:NCBI gene;Acc:100008805]                             |
| ENSOCUG00000011610  | Control | Dehydrated | 54.3724 | 104.481 | 0.942298 | 0.01599 | <i>VEGFA</i>        | vascular endothelial growth factor A [Source:NCBI gene;Acc:100008899]                       |
| ENSOCUG00000014187  | Control | Dehydrated | 0.7681  | 0.04936 | -3.95996 | 0.01599 | <i>MINARI</i>       | membrane integral NOTCH2 associated receptor 1 [Source:HGNC Symbol;Acc:HGNC:29172]          |
| ENSOCUG00000014189  | Control | Dehydrated | 86.0971 | 43.1619 | -0.99621 | 0.01599 | <i>ANXA8</i>        | annexin A8 [Source:NCBI gene;Acc:100008655]                                                 |
| ENSOCUG000000017373 | Control | Dehydrated | 13.3168 | 6.68049 | -0.99522 | 0.01599 | <i>PLEKHA7</i>      | pleckstrin homology domain containing A7 [Source:HGNC Symbol;Acc:HGNC:27049]                |
| ENSOCUG00000023796  | Control | Dehydrated | 35.4626 | 16.5947 | -1.09558 | 0.01599 | <i>LTF</i>          | lactotransferrin [Source:NCBI gene;Acc:100348741]                                           |
| ENSOCUG000000025113 | Control | Dehydrated | 8.58905 | 3.53785 | -1.27963 | 0.01599 | <i>MYCL</i>         | MYCL proto-oncogene, bHLH transcription factor [Source:NCBI gene;Acc:100340331]             |
| ENSOCUG00000025387  | Control | Dehydrated | 12.2822 | 24.4278 | 0.99196  | 0.01599 |                     | unknown                                                                                     |
| ENSOCUG00000026988  | Control | Dehydrated | 22.3859 | 9.74609 | -1.1997  | 0.01599 | <i>CHI3L1</i>       | chitinase 3 like 1 [Source:NCBI gene;Acc:100338424]                                         |
| ENSOCUG000000027480 | Control | Dehydrated | 0.63185 | 5.79091 | 3.19613  | 0.01599 |                     | unknown                                                                                     |
| ENSOCUG00000003071  | Control | Dehydrated | 15.0255 | 29.9181 | 0.99361  | 0.02025 | <i>LPIN1</i>        | lipin 1 [Source:NCBI gene;Acc:100346262]                                                    |
| ENSOCUG00000005775  | Control | Dehydrated | 3.11955 | 11.0062 | 1.8189   | 0.02025 | <i>MYBL2</i>        | MYB proto-oncogene like 2 [Source:NCBI gene;Acc:100346753]                                  |
| ENSOCUG00000007989  | Control | Dehydrated | 6.11007 | 16.3998 | 1.42441  | 0.02025 | <i>SPATA18</i>      | spermatogenesis associated 18 [Source:NCBI gene;Acc:100357633]                              |
| ENSOCUG00000008688  | Control | Dehydrated | 2.28021 | 5.84446 | 1.35791  | 0.02025 | <i>CFAP43</i>       | cilia and flagella associated protein 43 [Source:NCBI gene;Acc:100348513]                   |
| ENSOCUG00000015371  | Control | Dehydrated | 25.1535 | 13.2784 | -0.92168 | 0.02025 | <i>SPINT1</i>       | serine peptidase inhibitor, Kunitz type 1 [Source:NCBI gene;Acc:100345098]                  |
| ENSOCUG00000017421  | Control | Dehydrated | 218.642 | 110.162 | -0.98895 | 0.02025 | <i>KRT5</i>         | keratin 5 [Source:NCBI gene;Acc:100352658]                                                  |
| ENSOCUG00000027112  | Control | Dehydrated | 2067.14 | 1091.06 | -0.9219  | 0.02025 | <i>LOC100358162</i> | 60S ribosomal protein L28 [Source:NCBI gene;Acc:100358162]                                  |
| ENSOCUG00000002632  | Control | Dehydrated | 155.43  | 77.7336 | -0.99966 | 0.02378 | <i>KRT7</i>         | keratin 7 [Source:HGNC Symbol;Acc:HGNC:6445]                                                |
| ENSOCUG00000004176  | Control | Dehydrated | 0.83187 | 0.07437 | -3.48353 | 0.02378 | <i>ADAM28</i>       | ADAM metallopeptidase domain 28 [Source:HGNC Symbol;Acc:HGNC:206]                           |
| ENSOCUG00000004386  | Control | Dehydrated | 4.39804 | 10.5561 | 1.26315  | 0.02378 | <i>NFAT5</i>        | nuclear factor of activated T cells 5 [Source:NCBI gene;Acc:100343460]                      |
| ENSOCUG00000006498  | Control | Dehydrated | 11.508  | 5.79218 | -0.99046 | 0.02378 | <i>DSG1</i>         | desmoglein 1 [Source:NCBI gene;Acc:100346111]                                               |
| ENSOCUG00000012306  | Control | Dehydrated | 15.0428 | 7.69413 | -0.96724 | 0.02378 | <i>CDKN2B</i>       | cyclin dependent kinase inhibitor 2B [Source:NCBI gene;Acc:100351874]                       |
| ENSOCUG00000013200  | Control | Dehydrated | 20.9362 | 8.48848 | -1.30242 | 0.02378 | <i>SDCBP2</i>       | syndecan binding protein 2 [Source:NCBI gene;Acc:100349483]                                 |
| ENSOCUG00000016033  | Control | Dehydrated | 5.68573 | 2.15655 | -1.39862 | 0.02378 | <i>WNT10A</i>       | Wnt family member 10A [Source:NCBI gene;Acc:100352839]                                      |
| ENSOCUG00000017120  | Control | Dehydrated | 10.0164 | 20.0477 | 1.00106  | 0.02378 | <i>PDK4</i>         | pyruvate dehydrogenase kinase 4 [Source:NCBI gene;Acc:100351580]                            |
| ENSOCUG00000021297  | Control | Dehydrated | 75.2817 | 36.755  | -1.03436 | 0.02378 | <i>TRIM29</i>       | tripartite motif containing 29 [Source:NCBI gene;Acc:100340370]                             |
| ENSOCUG00000004691  | Control | Dehydrated | 7.5093  | 3.23464 | -1.21508 | 0.02779 | <i>PROM2</i>        | prominin 2 [Source:NCBI gene;Acc:100358327]                                                 |
| ENSOCUG00000010057  | Control | Dehydrated | 0.81388 | 2.43064 | 1.57845  | 0.02779 | <i>DNAH6</i>        | dynein axonemal heavy chain 6 [Source:NCBI gene;Acc:100341245]                              |
| ENSOCUG00000011842  | Control | Dehydrated | 76.1288 | 27.1735 | -1.48624 | 0.02779 | <i>CRNN</i>         | cornulin [Source:NCBI gene;Acc:100359146]                                                   |
| ENSOCUG00000023380  | Control | Dehydrated | 49.0972 | 22.7396 | -1.11043 | 0.02779 |                     | unknown                                                                                     |
| ENSOCUG000000001241 | Control | Dehydrated | 43.6458 | 22.0711 | -0.98368 | 0.03063 | <i>MFSD4A</i>       | major facilitator superfamily domain containing 4A [Source:NCBI gene;Acc:100348417]         |
| ENSOCUG00000002128  | Control | Dehydrated | 14.5446 | 7.74087 | -0.90992 | 0.03063 | <i>ANKRD35</i>      | ankyrin repeat domain 35 [Source:NCBI gene;Acc:100340763]                                   |
| ENSOCUG00000002582  | Control | Dehydrated | 11.4364 | 5.52557 | -1.04943 | 0.03063 | <i>F2RL1</i>        | F2R like trypsin receptor 1 [Source:HGNC Symbol;Acc:HGNC:3538]                              |
| ENSOCUG00000003276  | Control | Dehydrated | 9.93331 | 2.71933 | -1.86902 | 0.03063 | <i>PAX1</i>         | paired box 1 [Source:HGNC Symbol;Acc:HGNC:8615]                                             |
| ENSOCUG00000007002  | Control | Dehydrated | 169.508 | 87.0092 | -0.96212 | 0.03063 | <i>CLDN7</i>        | claudin 7 [Source:NCBI gene;Acc:100338591]                                                  |
| ENSOCUG00000009566  | Control | Dehydrated | 478.365 | 123.203 | -1.95708 | 0.03063 | <i>S100A8</i>       | S100 calcium binding protein A8 [Source:NCBI gene;Acc:100008985]                            |

|                    |         |            |         |         |          |         |                     |                                                                                                      |
|--------------------|---------|------------|---------|---------|----------|---------|---------------------|------------------------------------------------------------------------------------------------------|
| ENSOCUG00000013994 | Control | Dehydrated | 3.56826 | 0.35025 | -3.34875 | 0.03063 | <i>PLA2G4D</i>      | phospholipase A2 group IVD [Source:NCBI gene;Acc:100340775]                                          |
| ENSOCUG00000015184 | Control | Dehydrated | 0.30556 | 1.5619  | 2.35376  | 0.03063 | <i>MYBL1</i>        | MYB proto-oncogene like 1 [Source:NCBI gene;Acc:100345064]                                           |
| ENSOCUG00000024304 | Control | Dehydrated | 6.07398 | 12.1436 | 0.999478 | 0.03063 | <i>FNIP1</i>        | folliculin interacting protein 1 [Source:NCBI gene;Acc:103347864]                                    |
| ENSOCUG00000005112 | Control | Dehydrated | 59.8709 | 110.274 | 0.881168 | 0.03416 | <i>FBXO32</i>       | F-box protein 32 [Source:NCBI gene;Acc:100356177]                                                    |
| ENSOCUG00000007488 | Control | Dehydrated | 6.41429 | 2.71043 | -1.24276 | 0.03416 | <i>SUSD2</i>        | sushi domain containing 2 [Source:NCBI gene;Acc:100358655]                                           |
| ENSOCUG00000007849 | Control | Dehydrated | 0.69272 | 2.06189 | 1.57362  | 0.03416 | <i>FHAD1</i>        | forkhead associated phosphopeptide binding domain 1 [Source:HGNC Symbol;Acc:HGNC:29408]              |
| ENSOCUG00000010156 | Control | Dehydrated | 31.0389 | 10.9566 | -1.50227 | 0.03416 | <i>GJB2</i>         | gap junction protein beta 2 [Source:NCBI gene;Acc:100344821]                                         |
| ENSOCUG00000003831 | Control | Dehydrated | 15.3373 | 7.97255 | -0.94393 | 0.03687 | <i>C4orf19</i>      | chromosome 2 open reading frame, human C4orf19 [Source:NCBI gene;Acc:100351060]                      |
| ENSOCUG00000006774 | Control | Dehydrated | 0.43296 | 1.57569 | 1.86369  | 0.03687 | <i>SPEF2</i>        | sperm flagellar 2 [Source:NCBI gene;Acc:100353102]                                                   |
| ENSOCUG00000007545 | Control | Dehydrated | 10.9111 | 5.47011 | -0.99615 | 0.03687 | <i>EPHB6</i>        | EPH receptor B6 [Source:HGNC Symbol;Acc:HGNC:3396]                                                   |
| ENSOCUG00000011323 | Control | Dehydrated | 6.10852 | 1.44467 | -2.08008 | 0.03687 | <i>DNASE1</i>       | Oryctolagus cuniculus deoxyribonuclease 1 (DNASE1), mRNA. [Source:RefSeq mRNA;Acc:NM_001082740]      |
| ENSOCUG00000012863 | Control | Dehydrated | 4.07123 | 10.6866 | 1.39226  | 0.03687 | <i>CDHR3</i>        | cadherin related family member 3 [Source:NCBI gene;Acc:100356106]                                    |
| ENSOCUG00000017527 | Control | Dehydrated | 1.69531 | 4.64123 | 1.45296  | 0.03687 | <i>LRR1Q1</i>       | leucine rich repeats and IQ motif containing 1 [Source:NCBI gene;Acc:100339224]                      |
| ENSOCUG00000022231 | Control | Dehydrated | 384.473 | 212.87  | -0.85291 | 0.03687 | <i>EMPI1</i>        | epithelial membrane protein 1 [Source:NCBI gene;Acc:100009209]                                       |
| ENSOCUG00000002730 | Control | Dehydrated | 21.4831 | 11.4274 | -0.9107  | 0.0396  | <i>LRRC1</i>        | leucine rich repeat containing 1 [Source:NCBI gene;Acc:100355945]                                    |
| ENSOCUG00000005298 | Control | Dehydrated | 31.9444 | 7.79483 | -2.03497 | 0.0396  | <i>KLK11</i>        | kallikrein related peptidase 11 [Source:HGNC Symbol;Acc:HGNC:6359]                                   |
| ENSOCUG00000013684 | Control | Dehydrated | 23.0734 | 7.80634 | -1.56351 | 0.0396  | <i>TMEM54</i>       | transmembrane protein 54 [Source:NCBI gene;Acc:100340189]                                            |
| ENSOCUG00000013917 | Control | Dehydrated | 1.2374  | 3.63828 | 1.55595  | 0.0396  | <i>CFAP54</i>       | cilia and flagella associated protein 54 [Source:NCBI gene;Acc:100350156]                            |
| ENSOCUG00000014245 | Control | Dehydrated | 15.3149 | 7.94758 | -0.94635 | 0.0396  | <i>METRNL</i>       | meteorin like, glial cell differentiation regulator [Source:NCBI gene;Acc:100347364]                 |
| ENSOCUG00000016132 | Control | Dehydrated | 256.084 | 133.655 | -0.9381  | 0.0396  | <i>KRT19</i>        | keratin, type 1 cytoskeletal 19 [Source:NCBI gene;Acc:100344434]                                     |
| ENSOCUG00000002770 | Control | Dehydrated | 110.894 | 55.6321 | -0.99519 | 0.04169 | <i>FAM3D</i>        | family with sequence similarity 3 member D [Source:NCBI gene;Acc:100355374]                          |
| ENSOCUG00000008654 | Control | Dehydrated | 11.401  | 2.52973 | -2.1721  | 0.04169 |                     | unknown                                                                                              |
| ENSOCUG00000009646 | Control | Dehydrated | 6.15799 | 2.4338  | -1.33925 | 0.04169 | <i>SEC14LA</i>      | SEC14-like protein 4 [Source:NCBI gene;Acc:100358382]                                                |
| ENSOCUG00000011731 | Control | Dehydrated | 8.21451 | 2.36383 | -1.79705 | 0.04169 | <i>KRT10</i>        | keratin 10 [Source:NCBI gene;Acc:100009029]                                                          |
| ENSOCUG00000012103 | Control | Dehydrated | 3.51804 | 1.85077 | -0.92664 | 0.04169 | <i>FAT2</i>         | FAT atypical cadherin 2 [Source:NCBI gene;Acc:100347471]                                             |
| ENSOCUG00000015114 | Control | Dehydrated | 18.1901 | 10.0369 | -0.85785 | 0.04169 | <i>ZNF710</i>       | zinc finger protein 710 [Source:HGNC Symbol;Acc:HGNC:25352]                                          |
| ENSOCUG00000015653 | Control | Dehydrated | 20.2581 | 6.32264 | -1.6799  | 0.04169 | <i>RNF39</i>        | ring finger protein 39 [Source:NCBI gene;Acc:103349729]                                              |
| ENSOCUG00000016131 | Control | Dehydrated | 17.8401 | 6.5465  | -1.44633 | 0.04169 | <i>IL20RB</i>       | interleukin 20 receptor subunit beta [Source:HGNC Symbol;Acc:HGNC:6004]                              |
| ENSOCUG0000001374  | Control | Dehydrated | 1.64523 | 4.39039 | 1.41606  | 0.04476 | <i>TSHR</i>         | thyroid stimulating hormone receptor [Source:NCBI gene;Acc:100353965]                                |
| ENSOCUG00000016959 | Control | Dehydrated | 11.5078 | 6.36204 | -0.85505 | 0.04476 | <i>CRYBG2</i>       | crystallin beta-gamma domain containing 2 [Source:NCBI gene;Acc:100337821]                           |
| ENSOCUG00000023000 | Control | Dehydrated | 6.13659 | 1.8297  | -1.74583 | 0.04476 |                     | unknown                                                                                              |
| ENSOCUG00000004447 | Control | Dehydrated | 24.6607 | 13.5035 | -0.86888 | 0.04774 | <i>ALPL</i>         | alkaline phosphatase, biomineralization associated [Source:HGNC Symbol;Acc:HGNC:438]                 |
| ENSOCUG00000011294 | Control | Dehydrated | 16.7623 | 7.72903 | -1.11686 | 0.04774 | <i>LOC103345257</i> | L-threonine 3-dehydrogenase, mitochondrial [Source:NCBI gene;Acc:103345257]                          |
| ENSOCUG00000017253 | Control | Dehydrated | 9.17812 | 4.69495 | -0.96709 | 0.04774 | <i>ARHGEF4</i>      | Rho guanine nucleotide exchange factor 4 [Source:NCBI gene;Acc:100338395]                            |
| ENSOCUG00000000777 | Control | Dehydrated | 1.58753 | 0.39655 | -2.0012  | 0.04888 |                     | unknown                                                                                              |
| ENSOCUG00000004067 | Control | Dehydrated | 6.70321 | 14.335  | 1.09662  | 0.04888 | <i>CNST</i>         | consortin, connexin sorting protein [Source:NCBI gene;Acc:100346480]                                 |
| ENSOCUG00000006987 | Control | Dehydrated | 0.84786 | 2.97433 | 1.81067  | 0.04888 | <i>TSGA10</i>       | testis specific 10 [Source:NCBI gene;Acc:100348551]                                                  |
| ENSOCUG00000009400 | Control | Dehydrated | 0.62842 | 2.18092 | 1.79513  | 0.04888 | <i>DNAI2</i>        | dynein axonemal intermediate chain 2 [Source:NCBI gene;Acc:100356679]                                |
| ENSOCUG00000016105 | Control | Dehydrated | 10.2454 | 19.9724 | 0.96304  | 0.04888 | <i>COLQ</i>         | collagen like tail subunit of asymmetric acetylcholinesterase [Source:NCBI gene;Acc:100341444]       |
| ENSOCUG00000016920 | Control | Dehydrated | 0.86682 | 2.96836 | 1.77586  | 0.04888 | <i>NSUN7</i>        | NOP2/Sun RNA methyltransferase family member 7 [Source:NCBI gene;Acc:100353331]                      |
| ENSOCUG00000016943 | Control | Dehydrated | 236.506 | 94.6519 | -1.32117 | 0.04888 | <i>FAM25A</i>       | family with sequence similarity 25 member A [Source:NCBI gene;Acc:100348171]                         |
| ENSOCUG00000022921 | Control | Dehydrated | 12.3286 | 6.26588 | -0.97642 | 0.04888 | <i>CAMSAP3</i>      | calmodulin regulated spectrin associated protein family member 3 [Source:HGNC Symbol;Acc:HGNC:29307] |
| ENSOCUG00000026763 | Control | Dehydrated | 903.962 | 387.431 | -1.22232 | 0.04888 |                     | unknown                                                                                              |
| ENSOCUG00000027394 | Control | Dehydrated | 1614.42 | 766.483 | -1.07469 | 0.04888 |                     | unknown                                                                                              |
