# Supplementary material for: Unraveling the molecular pathobiology of vocal fold systemic dehydration using an in vivo rabbit model
Source: PubMed Central journal article supplement (PMC7394397; doi:10.1371/journal.pone.0236348), 2020-07-31
Supplement: pone.0236348.s005.pdf [file pone.0236348.s005.pdf]

**Table S4. Functional categories of differentially expressed (DE) genes in dehydrated vocal folds by GO\_TERM FAT and KEGG pathway enrichment analysis.**

| Category      | Term                                                           | Count | %      | p-value   | DE genes list                                                                                                                                                                                                                                                                                                                                                                                                                                                                                                                                                                 | List total | Pop hits | Pop total | Fold enrichment | FDR      |
|---------------|----------------------------------------------------------------|-------|--------|-----------|-------------------------------------------------------------------------------------------------------------------------------------------------------------------------------------------------------------------------------------------------------------------------------------------------------------------------------------------------------------------------------------------------------------------------------------------------------------------------------------------------------------------------------------------------------------------------------|------------|----------|-----------|-----------------|----------|
| GOTERM_BP_FAT | GO:0009605--response to external stimulus                      | 28    | 15.135 | 3.40E-04  | ENSOCUG00000000786, ENSOCUG00000004447, ENSOCUG00000005107, ENSOCUG00000013593, ENSOCUG00000012306, ENSOCUG00000014668, ENSOCUG0000000737, ENSOCUG00000023739, ENSOCUG00000011610, ENSOCUG0000002424, ENSOCUG00000009566, ENSOCUG00000014245, ENSOCUG00000008779, ENSOCUG00000029281, ENSOCUG00000016068, ENSOCUG00000023796, ENSOCUG00000016131, ENSOCUG00000017120, ENSOCUG00000004459, ENSOCUG00000002745, ENSOCUG00000007002, ENSOCUG00000024304, ENSOCUG00000015518, ENSOCUG00000026988, ENSOCUG00000029190, ENSOCUG00000010998, ENSOCUG00000022335, ENSOCUG000000022646 | 118        | 1139     | 9777      | 2.03684469      | 0.587364 |
| GOTERM_BP_FAT | GO:0006952--defense response                                   | 23    | 12.432 | 2.66E-05  | ENSOCUG00000000786, ENSOCUG00000008771, ENSOCUG00000016068, ENSOCUG00000023796, ENSOCUG00000016131, ENSOCUG00000013593, ENSOCUG00000017120, ENSOCUG0000002745, ENSOCUG00000004625, ENSOCUG0000007545, ENSOCUG00000007002, ENSOCUG00000011786, ENSOCUG00000002424, ENSOCUG00000009566, ENSOCUG00000014998, ENSOCUG00000014245, ENSOCUG00000008779, ENSOCUG00000015518, ENSOCUG00000026988, ENSOCUG00000029190, ENSOCUG00000010998, ENSOCUG00000022335, ENSOCUG000000022646                                                                                                     | 118        | 705      | 9777      | 2.703101334     | 0.046197 |
| GOTERM_BP_FAT | GO:0070887--cellular response to chemical stimulus             | 23    | 12.432 | 0.047393  | ENSOCUG00000000786, ENSOCUG00000029281, ENSOCUG00000008771, ENSOCUG00000016033, ENSOCUG00000016068, ENSOCUG00000023796, ENSOCUG00000004447, ENSOCUG00000017120, ENSOCUG00000012306, ENSOCUG00000004459, ENSOCUG00000002745, ENSOCUG00000014668, ENSOCUG00000000737, ENSOCUG00000023739, ENSOCUG00000001230, ENSOCUG00000005112, ENSOCUG00000011610, ENSOCUG00000011786, ENSOCUG00000002424, ENSOCUG00000009566, ENSOCUG00000026988, ENSOCUG00000010998, ENSOCUG000000022646                                                                                                   | 118        | 1275     | 9777      | 1.494656032     | 56.91558 |
| GOTERM_BP_FAT | GO:0008283--cell proliferation                                 | 21    | 11.351 | 0.015269  | ENSOCUG00000000786, ENSOCUG00000011082, ENSOCUG00000008771, ENSOCUG00000016657, ENSOCUG00000005634, ENSOCUG00000023796, ENSOCUG00000016131, ENSOCUG00000012774, ENSOCUG00000006405, ENSOCUG00000012306, ENSOCUG00000004459, ENSOCUG00000007545, ENSOCUG00000000737, ENSOCUG0000001230, ENSOCUG00000029153, ENSOCUG00000008947, ENSOCUG00000011610, ENSOCUG00000011786, ENSOCUG00000013779, ENSOCUG00000029190, ENSOCUG00000011658                                                                                                                                             | 118        | 1004     | 9777      | 1.733042407     | 23.42039 |
| GOTERM_BP_FAT | GO:0065009--regulation of molecular function                   | 21    | 11.351 | 0.0525453 | ENSOCUG00000000786, ENSOCUG00000011082, ENSOCUG00000016068, ENSOCUG00000004691, ENSOCUG00000023796, ENSOCUG00000004067, ENSOCUG00000005107, ENSOCUG00000006405, ENSOCUG00000013357, ENSOCUG00000012306, ENSOCUG00000014668, ENSOCUG00000007545, ENSOCUG00000001230, ENSOCUG00000029153, ENSOCUG00000022921, ENSOCUG000000024304, ENSOCUG00000011610, ENSOCUG00000011786, ENSOCUG00000009566, ENSOCUG00000008779, ENSOCUG00000026988                                                                                                                                           | 118        | 1146     | 9777      | 1.518302423     | 60.78299 |
| GOTERM_BP_FAT | GO:0022610--biological adhesion                                | 20    | 10.811 | 0.002409  | ENSOCUG00000000786, ENSOCUG00000012863, ENSOCUG00000011082, ENSOCUG00000006498, ENSOCUG00000016068, ENSOCUG00000021242, ENSOCUG00000023796, ENSOCUG00000016131, ENSOCUG00000026334, ENSOCUG00000011842, ENSOCUG00000010458, ENSOCUG00000012103, ENSOCUG00000007545, ENSOCUG0000000737, ENSOCUG00000029153, ENSOCUG00000022921, ENSOCUG00000011610, ENSOCUG00000009566, ENSOCUG00000013779, ENSOCUG00000017373                                                                                                                                                                 | 118        | 787      | 9777      | 2.105614541     | 4.096448 |
| GOTERM_BP_FAT | GO:0007155--cell adhesion                                      | 19    | 10.27  | 0.0052206 | ENSOCUG00000000786, ENSOCUG00000012863, ENSOCUG00000011082, ENSOCUG00000006498, ENSOCUG00000016068, ENSOCUG00000021242, ENSOCUG00000016131, ENSOCUG00000026334, ENSOCUG00000011842, ENSOCUG00000010458, ENSOCUG00000012103, ENSOCUG00000007545, ENSOCUG0000000737, ENSOCUG00000029153, ENSOCUG00000022921, ENSOCUG00000011610, ENSOCUG00000009566, ENSOCUG00000013779, ENSOCUG00000017373                                                                                                                                                                                     | 118        | 782      | 9777      | 2.013123672     | 8.677534 |
| GOTERM_BP_FAT | GO:0042127--regulation of cell proliferation                   | 19    | 10.27  | 0.0096304 | ENSOCUG00000011082, ENSOCUG00000008771, ENSOCUG00000005202, ENSOCUG00000025736, ENSOCUG00000016657, ENSOCUG00000005634, ENSOCUG00000023796, ENSOCUG00000016131, ENSOCUG00000012774, ENSOCUG00000006405, ENSOCUG00000012306, ENSOCUG00000000737, ENSOCUG0000001230, ENSOCUG00000029153, ENSOCUG00000008947, ENSOCUG00000011610, ENSOCUG00000011786, ENSOCUG00000029190, ENSOCUG00000011658                                                                                                                                                                                     | 118        | 831      | 9777      | 1.894419629     | 15.44941 |
| GOTERM_BP_FAT | GO:0008219--cell death                                         | 19    | 10.27  | 0.0522758 | ENSOCUG00000000786, ENSOCUG00000008771, ENSOCUG00000016068, ENSOCUG00000012899, ENSOCUG00000017120, ENSOCUG00000009682, ENSOCUG00000006405, ENSOCUG00000022231, ENSOCUG00000014668, ENSOCUG0000000737, ENSOCUG0000001230, ENSOCUG00000000197, ENSOCUG00000006275, ENSOCUG00000024304, ENSOCUG00000011610, ENSOCUG00000009566, ENSOCUG00000029190, ENSOCUG00000011323, ENSOCUG00000004918                                                                                                                                                                                      | 118        | 1004     | 9777      | 1.567990749     | 60.58915 |
| GOTERM_BP_FAT | GO:2000026--regulation of multicellular organismal development | 19    | 10.27  | 0.0714852 | ENSOCUG00000000786, ENSOCUG00000011082, ENSOCUG00000008771, ENSOCUG00000016033, ENSOCUG00000016068, ENSOCUG00000025113, ENSOCUG00000005107, ENSOCUG00000010458, ENSOCUG00000006405, ENSOCUG00000013357, ENSOCUG00000001230, ENSOCUG00000029153, ENSOCUG000000024304, ENSOCUG00000011610, ENSOCUG00000011786, ENSOCUG00000013779, ENSOCUG00000016105, ENSOCUG00000026988, ENSOCUG00000029569                                                                                                                                                                                   | 118        | 1045     | 9777      | 1.506471495     | 72.36941 |
| GOTERM_BP_FAT | GO:0042592--homeostatic process                                | 18    | 9.7297 | 0.047595  | ENSOCUG00000008771, ENSOCUG00000023796, ENSOCUG00000016131, ENSOCUG00000012899, ENSOCUG00000008818, ENSOCUG00000017120, ENSOCUG00000006405, ENSOCUG00000013357, ENSOCUG00000004459, ENSOCUG0000000737, ENSOCUG00000014668, ENSOCUG00000000197, ENSOCUG00000029153, ENSOCUG00000006275, ENSOCUG0000002944, ENSOCUG00000014245, ENSOCUG00000013779, ENSOCUG00000006251                                                                                                                                                                                                          | 118        | 923      | 9777      | 1.61582533      | 57.07377 |

|               |                                                                     |    |        |           |                                                                                                                                                                                                                                                                                                                                                                  |     |     |      |             |          |
|---------------|---------------------------------------------------------------------|----|--------|-----------|------------------------------------------------------------------------------------------------------------------------------------------------------------------------------------------------------------------------------------------------------------------------------------------------------------------------------------------------------------------|-----|-----|------|-------------|----------|
| GOTERM_BP_FAT | GO:0012501~programmed cell death                                    | 18 | 9.7297 | 0.0566515 | ENSOCUG0000000786, ENSOCUG00000008771, ENSOCUG00000016068, ENSOCUG00000012899, ENSOCUG00000017120, ENSOCUG0000009682, ENSOCUG0000006405, ENSOCUG0000000737, ENSOCUG00000014668, ENSOCUG0000001230, ENSOCUG0000000197, ENSOCUG00000006275, ENSOCUG00000024304, ENSOCUG00000011610, ENSOCUG00000009566, ENSOCUG00000029190, ENSOCUG00000011323, ENSOCUG00000004918 | 118 | 944 | 9777 | 1.579880063 | 63.62847 |
| GOTERM_BP_FAT | GO:0006955~immune response                                          | 17 | 9.1892 | 0.0042327 | ENSOCUG00000029281, ENSOCUG00000008771, ENSOCUG00000023796, ENSOCUG00000016131, ENSOCUG00000013593, ENSOCUG0000002745, ENSOCUG00000007545, ENSOCUG00000000737, ENSOCUG00000023739, ENSOCUG0000007488, ENSOCUG00000009566, ENSOCUG00000011786, ENSOCUG00000014998, ENSOCUG00000008779, ENSOCUG00000015518, ENSOCUG00000010998, ENSOCUG00000022646                 | 118 | 646 | 9777 | 2.180419269 | 7.091983 |
| GOTERM_BP_FAT | GO:0060429~epithelium development                                   | 17 | 9.1892 | 0.0080018 | ENSOCUG0000000786, ENSOCUG00000016033, ENSOCUG00000005634, ENSOCUG00000025113, ENSOCUG00000014548, ENSOCUG00000012899, ENSOCUG00000012774, ENSOCUG00000013357, ENSOCUG00000006405, ENSOCUG00000011731, ENSOCUG00000015371, ENSOCUG0000001230, ENSOCUG00000029153, ENSOCUG0000001114, ENSOCUG00000013779, ENSOCUG00000008779, ENSOCUG00000029569                  | 118 | 691 | 9777 | 2.038423802 | 13.00557 |
| GOTERM_BP_FAT | GO:0050790~regulation of catalytic activity                         | 17 | 9.1892 | 0.0259851 | ENSOCUG0000000786, ENSOCUG00000011082, ENSOCUG00000004691, ENSOCUG00000023796, ENSOCUG00000004067, ENSOCUG0000006405, ENSOCUG00000013357, ENSOCUG00000012306, ENSOCUG0000001230, ENSOCUG00000029153, ENSOCUG00000022921, ENSOCUG00000024304, ENSOCUG00000011610, ENSOCUG0000009566, ENSOCUG00000011786, ENSOCUG00000008779, ENSOCUG00000026988                   | 118 | 791 | 9777 | 1.780721678 | 36.65634 |
| GOTERM_BP_FAT | GO:0006915~apoptotic process                                        | 17 | 9.1892 | 0.0638883 | ENSOCUG0000000786, ENSOCUG00000008771, ENSOCUG00000016068, ENSOCUG00000017120, ENSOCUG00000009682, ENSOCUG0000006405, ENSOCUG0000000737, ENSOCUG00000014668, ENSOCUG0000001230, ENSOCUG0000000197, ENSOCUG00000006275, ENSOCUG00000024304, ENSOCUG00000011610, ENSOCUG0000009566, ENSOCUG00000029190, ENSOCUG00000011323, ENSOCUG00000004918                     | 118 | 889 | 9777 | 1.584421651 | 68.17553 |
| GOTERM_BP_FAT | GO:0002682~regulation of immune system process                      | 16 | 8.6486 | 0.0312519 | ENSOCUG00000008771, ENSOCUG00000016068, ENSOCUG00000023796, ENSOCUG00000016131, ENSOCUG00000013593, ENSOCUG00000017120, ENSOCUG0000002745, ENSOCUG00000004625, ENSOCUG00000007545, ENSOCUG0000000737, ENSOCUG0000007002, ENSOCUG00000006275, ENSOCUG00000024304, ENSOCUG00000011786, ENSOCUG00000013779, ENSOCUG00000008779                                      | 118 | 743 | 9777 | 1.784246185 | 42.34097 |
| GOTERM_BP_FAT | GO:0048646~anatomical structure formation involved in morphogenesis | 16 | 8.6486 | 0.0453968 | ENSOCUG0000000786, ENSOCUG00000011082, ENSOCUG00000008771, ENSOCUG00000016068, ENSOCUG00000016132, ENSOCUG0000005107, ENSOCUG00000010458, ENSOCUG00000013357, ENSOCUG00000015371, ENSOCUG0000000737, ENSOCUG00000011610, ENSOCUG0000007586, ENSOCUG00000011786, ENSOCUG00000006774, ENSOCUG00000026988, ENSOCUG00000009400                                       | 118 | 781 | 9777 | 1.69743267  | 55.32277 |
| GOTERM_BP_FAT | GO:0008544~epidermis development                                    | 14 | 7.5676 | 6.58E-08  | ENSOCUG0000000786, ENSOCUG00000016033, ENSOCUG00000025113, ENSOCUG00000014548, ENSOCUG00000012899, ENSOCUG00000017717, ENSOCUG00000013357, ENSOCUG0000006405, ENSOCUG00000011731, ENSOCUG00000029153, ENSOCUG0000001114, ENSOCUG00000013779, ENSOCUG00000008779, ENSOCUG00000029569                                                                              | 118 | 163 | 9777 | 7.116460435 | 1.14E-04 |
| GOTERM_BP_FAT | GO:0030855~epithelial cell differentiation                          | 14 | 7.5676 | 2.72E-04  | ENSOCUG0000000786, ENSOCUG00000005634, ENSOCUG00000025113, ENSOCUG00000014548, ENSOCUG00000012899, ENSOCUG00000012774, ENSOCUG00000006405, ENSOCUG00000011731, ENSOCUG0000001230, ENSOCUG0000001114, ENSOCUG00000029153, ENSOCUG00000013779, ENSOCUG00000008779, ENSOCUG00000029569                                                                              | 118 | 350 | 9777 | 3.314237288 | 0.470124 |
| GOTERM_BP_FAT | GO:0001816~cytokine production                                      | 14 | 7.5676 | 9.17E-04  | ENSOCUG0000000786, ENSOCUG00000008771, ENSOCUG00000016068, ENSOCUG00000029153, ENSOCUG00000004386, ENSOCUG00000023796, ENSOCUG00000016131, ENSOCUG00000026334, ENSOCUG00000014998, ENSOCUG00000026988, ENSOCUG00000013593, ENSOCUG00000010998, ENSOCUG0000000737, ENSOCUG00000007545                                                                             | 118 | 398 | 9777 | 2.914530279 | 1.578202 |
| GOTERM_BP_FAT | GO:0043207~response to external biotic stimulus                     | 14 | 7.5676 | 0.0029094 | ENSOCUG0000000786, ENSOCUG00000016068, ENSOCUG00000023796, ENSOCUG00000013593, ENSOCUG00000017120, ENSOCUG0000002745, ENSOCUG00000023739, ENSOCUG00000007002, ENSOCUG00000008779, ENSOCUG00000015518, ENSOCUG00000029190, ENSOCUG00000010998, ENSOCUG00000022335, ENSOCUG00000022646                                                                             | 118 | 453 | 9777 | 2.560668986 | 4.927277 |
| GOTERM_BP_FAT | GO:0051707~response to other organism                               | 14 | 7.5676 | 0.0029094 | ENSOCUG0000000786, ENSOCUG00000016068, ENSOCUG00000023796, ENSOCUG00000013593, ENSOCUG00000017120, ENSOCUG0000002745, ENSOCUG00000023739, ENSOCUG00000007002, ENSOCUG00000008779, ENSOCUG00000015518, ENSOCUG00000029190, ENSOCUG00000010998, ENSOCUG00000022335, ENSOCUG00000022646                                                                             | 118 | 453 | 9777 | 2.560668986 | 4.927277 |
| GOTERM_BP_FAT | GO:0009607~response to biotic stimulus                              | 14 | 7.5676 | 0.0049235 | ENSOCUG0000000786, ENSOCUG00000016068, ENSOCUG00000023796, ENSOCUG00000013593, ENSOCUG00000017120, ENSOCUG0000002745, ENSOCUG00000023739, ENSOCUG00000007002, ENSOCUG00000008779, ENSOCUG00000015518, ENSOCUG00000029190, ENSOCUG00000010998, ENSOCUG00000022335, ENSOCUG00000022646                                                                             | 118 | 482 | 9777 | 2.40660384  | 8.203381 |
| GOTERM_BP_FAT | GO:0098609~cell-cell adhesion                                       | 14 | 7.5676 | 0.0079395 | ENSOCUG00000012863, ENSOCUG00000006498, ENSOCUG00000021242, ENSOCUG00000016131, ENSOCUG00000011842, ENSOCUG00000010458, ENSOCUG00000012103, ENSOCUG00000007545, ENSOCUG00000000737, ENSOCUG00000029153, ENSOCUG00000022921, ENSOCUG00000009566, ENSOCUG00000017373, ENSOCUG00000013779                                                                           | 118 | 511 | 9777 | 2.27002554  | 12.91079 |

|               |                                                        |    |        |           |                                                                                                                                                                                                                                                                  |     |     |      |             |          |
|---------------|--------------------------------------------------------|----|--------|-----------|------------------------------------------------------------------------------------------------------------------------------------------------------------------------------------------------------------------------------------------------------------------|-----|-----|------|-------------|----------|
| GOTERM_BP_FAT | GO:006954~inflammatory response                        | 13 | 7.027  | 1.31E-04  | ENSOCUG0000000786, ENSOCUG00000008771, ENSOCUG00000016068, ENSOCUG00000016131, ENSOCUG0000004625, ENSOCUG0000007545, ENSOCUG0000002424, ENSOCUG0000009566, ENSOCUG00000011786, ENSOCUG00000014245, ENSOCUG00000014998, ENSOCUG00000026988, ENSOCUG00000022646    | 118 | 281 | 9777 | 3.833192593 | 0.226537 |
| GOTERM_BP_FAT | GO:0098542~defense response to other organism          | 13 | 7.027  | 1.54E-04  | ENSOCUG00000000786, ENSOCUG00000016068, ENSOCUG00000023796, ENSOCUG00000013593, ENSOCUG00000017120, ENSOCUG0000002745, ENSOCUG0000007002, ENSOCUG00000008779, ENSOCUG00000015518, ENSOCUG00000029190, ENSOCUG00000010998, ENSOCUG00000022335, ENSOCUG00000022646 | 118 | 286 | 9777 | 3.766178737 | 0.267313 |
| GOTERM_BP_FAT | GO:0051336~regulation of hydrolase activity            | 13 | 7.027  | 0.0017262 | ENSOCUG00000000786, ENSOCUG00000011082, ENSOCUG0000004691, ENSOCUG00000023796, ENSOCUG0000004067, ENSOCUG00000013357, ENSOCUG0000006405, ENSOCUG00000001230, ENSOCUG00000022921, ENSOCUG00000024304, ENSOCUG0000009566, ENSOCUG00000011786, ENSOCUG00000008779   | 118 | 375 | 9777 | 2.872338983 | 2.951782 |
| GOTERM_BP_FAT | GO:0043588~skin development                            | 12 | 6.4865 | 1.55E-06  | ENSOCUG00000000786, ENSOCUG00000016033, ENSOCUG00000029153, ENSOCUG00000001114, ENSOCUG00000014548, ENSOCUG00000012899, ENSOCUG0000006280, ENSOCUG00000013779, ENSOCUG00000029569, ENSOCUG0000006405, ENSOCUG00000013357, ENSOCUG00000011731                     | 118 | 149 | 9777 | 6.672960983 | 0.002682 |
| GOTERM_BP_FAT | GO:0098602~single organism cell adhesion               | 12 | 6.4865 | 0.0270136 | ENSOCUG00000011082, ENSOCUG00000029153, ENSOCUG00000021242, ENSOCUG00000022921, ENSOCUG00000016131, ENSOCUG0000009566, ENSOCUG00000011842, ENSOCUG00000017373, ENSOCUG00000013779, ENSOCUG00000010458, ENSOCUG0000000737, ENSOCUG00000007545                     | 118 | 476 | 9777 | 2.088805014 | 37.80632 |
| GOTERM_BP_FAT | GO:0009913~epidermal cell differentiation              | 11 | 5.9459 | 2.86E-07  | ENSOCUG00000000786, ENSOCUG00000029153, ENSOCUG0000001114, ENSOCUG00000014548, ENSOCUG00000025113, ENSOCUG00000012899, ENSOCUG00000013779, ENSOCUG00000008779, ENSOCUG00000029569, ENSOCUG0000006405, ENSOCUG00000011731                                         | 118 | 100 | 9777 | 9.114152542 | 4.97E-04 |
| GOTERM_BP_FAT | GO:0048871~multicellular organismal homeostasis        | 11 | 5.9459 | 1.48E-04  | ENSOCUG00000000786, ENSOCUG00000029153, ENSOCUG0000006275, ENSOCUG00000023796, ENSOCUG00000016131, ENSOCUG00000012899, ENSOCUG00000014245, ENSOCUG00000006405, ENSOCUG00000013357, ENSOCUG0000000737, ENSOCUG00000014668                                         | 118 | 202 | 9777 | 4.511956704 | 0.256728 |
| GOTERM_BP_FAT | GO:0001817~regulation of cytokine production           | 11 | 5.9459 | 0.0117825 | ENSOCUG00000000786, ENSOCUG00000008771, ENSOCUG00000016068, ENSOCUG00000029153, ENSOCUG00000023796, ENSOCUG00000016131, ENSOCUG00000026334, ENSOCUG00000014998, ENSOCUG00000013593, ENSOCUG00000010998, ENSOCUG0000000737                                        | 118 | 364 | 9777 | 2.503888061 | 18.57984 |
| GOTERM_BP_FAT | GO:0016337~single organismal cell-cell adhesion        | 11 | 5.9459 | 0.0377992 | ENSOCUG00000029153, ENSOCUG00000021242, ENSOCUG00000022921, ENSOCUG00000016131, ENSOCUG0000009566, ENSOCUG00000011842, ENSOCUG00000017373, ENSOCUG00000013779, ENSOCUG00000010458, ENSOCUG0000000737, ENSOCUG00000007545                                         | 118 | 440 | 9777 | 2.071398305 | 48.73844 |
| GOTERM_BP_FAT | GO:0032101~regulation of response to external stimulus | 11 | 5.9459 | 0.0480407 | ENSOCUG00000016068, ENSOCUG0000007002, ENSOCUG00000023796, ENSOCUG00000016131, ENSOCUG00000011610, ENSOCUG0000009566, ENSOCUG00000014245, ENSOCUG00000008779, ENSOCUG00000005107, ENSOCUG00000017120, ENSOCUG0000002745                                          | 118 | 459 | 9777 | 1.985654149 | 57.42083 |
| GOTERM_BP_FAT | GO:0008284~positive regulation of cell proliferation   | 11 | 5.9459 | 0.0534929 | ENSOCUG00000011082, ENSOCUG00000016657, ENSOCUG0000005634, ENSOCUG00000029153, ENSOCUG0000008947, ENSOCUG00000023796, ENSOCUG00000011610, ENSOCUG00000011786, ENSOCUG00000029190, ENSOCUG00000011658, ENSOCUG0000000737                                          | 118 | 468 | 9777 | 1.947468492 | 61.45772 |
| GOTERM_BP_FAT | GO:0050673~epithelial cell proliferation               | 10 | 5.4054 | 0.0015259 | ENSOCUG00000000786, ENSOCUG00000001230, ENSOCUG0000005634, ENSOCUG00000011610, ENSOCUG00000011786, ENSOCUG00000013779, ENSOCUG00000012774, ENSOCUG0000006405, ENSOCUG00000012306, ENSOCUG0000000737                                                              | 118 | 226 | 9777 | 3.66619169  | 2.61345  |
| GOTERM_BP_FAT | GO:0009617~response to bacterium                       | 10 | 5.4054 | 0.0025745 | ENSOCUG00000023739, ENSOCUG0000000786, ENSOCUG00000016068, ENSOCUG00000023796, ENSOCUG00000015518, ENSOCUG0000008779, ENSOCUG00000013593, ENSOCUG00000029190, ENSOCUG0000002745, ENSOCUG00000022335                                                              | 118 | 244 | 9777 | 3.395734926 | 4.372049 |
| GOTERM_BP_FAT | GO:0001568~blood vessel development                    | 10 | 5.4054 | 0.0372114 | ENSOCUG00000000786, ENSOCUG0000001230, ENSOCUG00000008771, ENSOCUG00000011082, ENSOCUG00000016068, ENSOCUG00000011610, ENSOCUG00000011786, ENSOCUG00000013779, ENSOCUG00000026988, ENSOCUG00000015371                                                            | 118 | 378 | 9777 | 2.191955878 | 48.19263 |
| GOTERM_BP_FAT | GO:0001944~vasculature development                     | 10 | 5.4054 | 0.0548755 | ENSOCUG00000000786, ENSOCUG0000001230, ENSOCUG00000008771, ENSOCUG00000011082, ENSOCUG00000016068, ENSOCUG00000011610, ENSOCUG00000011786, ENSOCUG00000013779, ENSOCUG00000026988, ENSOCUG00000015371                                                            | 118 | 407 | 9777 | 2.035772229 | 62.42253 |
| GOTERM_BP_FAT | GO:0030216~keratinocyte differentiation                | 9  | 4.8649 | 8.37E-07  | ENSOCUG00000000786, ENSOCUG00000029153, ENSOCUG0000001114, ENSOCUG00000014548, ENSOCUG00000012899, ENSOCUG00000013779, ENSOCUG00000029569, ENSOCUG0000006405, ENSOCUG00000011731                                                                                 | 118 | 64  | 9777 | 11.65161547 | 0.001452 |
| GOTERM_BP_FAT | GO:0042742~defense response to bacterium               | 9  | 4.8649 | 7.17E-05  | ENSOCUG00000000786, ENSOCUG00000016068, ENSOCUG00000023796, ENSOCUG00000015518, ENSOCUG00000008779, ENSOCUG00000013593, ENSOCUG00000029190, ENSOCUG0000002745, ENSOCUG00000022335                                                                                | 118 | 116 | 9777 | 6.428477499 | 0.124233 |
| GOTERM_BP_FAT | GO:0048514~blood vessel morphogenesis                  | 9  | 4.8649 | 0.0356249 | ENSOCUG00000000786, ENSOCUG0000001230, ENSOCUG00000008771, ENSOCUG00000011082, ENSOCUG00000016068, ENSOCUG00000011610, ENSOCUG00000011786, ENSOCUG00000013779, ENSOCUG00000026988                                                                                | 118 | 316 | 9777 | 2.359820854 | 46.692   |
| GOTERM_BP_FAT | GO:0031347~regulation of defense response              | 9  | 4.8649 | 0.0658868 | ENSOCUG00000016068, ENSOCUG0000007002, ENSOCUG00000023796, ENSOCUG00000016131, ENSOCUG0000009566, ENSOCUG00000014245, ENSOCUG00000008779, ENSOCUG00000017120, ENSOCUG00000002745                                                                                 | 118 | 359 | 9777 | 2.077168217 | 69.33343 |
| GOTERM_BP_FAT | GO:1901342~regulation of vasculature development       | 8  | 4.3243 | 0.0019567 | ENSOCUG00000000786, ENSOCUG0000001230, ENSOCUG00000008771, ENSOCUG00000011082, ENSOCUG00000016068, ENSOCUG00000011610, ENSOCUG00000011786, ENSOCUG00000026988                                                                                                    | 118 | 148 | 9777 | 4.478699038 | 3.33962  |

|               |                                                                             |   |        |           |                                                                                                                                                                 |     |     |      |             |          |
|---------------|-----------------------------------------------------------------------------|---|--------|-----------|-----------------------------------------------------------------------------------------------------------------------------------------------------------------|-----|-----|------|-------------|----------|
| GOTERM_BP_FAT | GO:0050678--regulation of epithelial cell proliferation                     | 8 | 4.3243 | 0.0066976 | ENSOCUG0000001230, ENSOCUG00000029153, ENSOCUG00000011610, ENSOCUG00000011786, ENSOCUG00000012774, ENSOCUG0000006405, ENSOCUG00000012306, ENSOCUG00000000737    | 118 | 185 | 9777 | 3.58295923  | 11.00073 |
| GOTERM_BP_FAT | GO:0043086--negative regulation of catalytic activity                       | 8 | 4.3243 | 0.0409916 | ENSOCUG00000011082, ENSOCUG00000022921, ENSOCUG00000024304, ENSOCUG000000023796, ENSOCUG00000004067, ENSOCUG00000011786, ENSOCUG00000008779, ENSOCUG00000006405 | 118 | 267 | 9777 | 2.482574748 | 51.60923 |
| GOTERM_BP_FAT | GO:0006935--chemotaxis                                                      | 8 | 4.3243 | 0.0856474 | ENSOCUG00000000786, ENSOCUG00000029281, ENSOCUG00000016068, ENSOCUG00000011610, ENSOCUG00000009566, ENSOCUG0000002424, ENSOCUG00000002745, ENSOCUG00000000737   | 118 | 317 | 9777 | 2.091001444 | 78.83446 |
| GOTERM_BP_FAT | GO:0042330--taxis                                                           | 8 | 4.3243 | 0.0867476 | ENSOCUG00000000786, ENSOCUG00000029281, ENSOCUG00000016068, ENSOCUG00000011610, ENSOCUG00000009566, ENSOCUG0000002424, ENSOCUG00000002745, ENSOCUG00000000737   | 118 | 318 | 9777 | 2.084425967 | 79.27179 |
| GOTERM_BP_FAT | GO:0045765--regulation of angiogenesis                                      | 7 | 3.7838 | 0.0059571 | ENSOCUG00000000786, ENSOCUG0000008771, ENSOCUG00000011082, ENSOCUG00000016068, ENSOCUG00000011610, ENSOCUG00000011786, ENSOCUG00000026988                       | 118 | 137 | 9777 | 4.233514784 | 9.842988 |
| GOTERM_BP_FAT | GO:0051346--negative regulation of hydrolase activity                       | 7 | 3.7838 | 0.0080605 | ENSOCUG00000022921, ENSOCUG00000024304, ENSOCUG00000023796, ENSOCUG00000004067, ENSOCUG00000011786, ENSOCUG0000008779, ENSOCUG00000006405                       | 118 | 146 | 9777 | 3.972544695 | 13.09489 |
| GOTERM_BP_FAT | GO:0060326--cell chemotaxis                                                 | 7 | 3.7838 | 0.0153732 | ENSOCUG00000000786, ENSOCUG00000029281, ENSOCUG00000016068, ENSOCUG00000011610, ENSOCUG00000009566, ENSOCUG0000002424, ENSOCUG00000002745                       | 118 | 168 | 9777 | 3.452330508 | 23.56083 |
| GOTERM_BP_FAT | GO:0030031--cell projection assembly                                        | 7 | 3.7838 | 0.0712422 | ENSOCUG00000006987, ENSOCUG0000000786, ENSOCUG00000017253, ENSOCUG00000007586, ENSOCUG00000006774, ENSOCUG00000022231, ENSOCUG00000009400                       | 118 | 243 | 9777 | 2.386796401 | 72.24376 |
| GOTERM_BP_FAT | GO:0001525--angiogenesis                                                    | 7 | 3.7838 | 0.0865199 | ENSOCUG00000000786, ENSOCUG0000008771, ENSOCUG00000011082, ENSOCUG00000016068, ENSOCUG00000011610, ENSOCUG00000011786, ENSOCUG00000026988                       | 118 | 256 | 9777 | 2.265591896 | 79.18198 |
| GOTERM_BP_FAT | GO:0045682--regulation of epidermis development                             | 6 | 3.2432 | 2.09E-04  | ENSOCUG00000029153, ENSOCUG00000025113, ENSOCUG00000012899, ENSOCUG00000013779, ENSOCUG00000029569, ENSOCUG0000006405                                           | 118 | 46  | 9777 | 10.8072955  | 0.361287 |
| GOTERM_BP_FAT | GO:0045766--positive regulation of angiogenesis                             | 6 | 3.2432 | 0.002116  | ENSOCUG00000008771, ENSOCUG00000011082, ENSOCUG00000016068, ENSOCUG00000011610, ENSOCUG00000011786, ENSOCUG00000026988                                          | 118 | 76  | 9777 | 6.541257806 | 3.606815 |
| GOTERM_BP_FAT | GO:1904018--positive regulation of vasculature development                  | 6 | 3.2432 | 0.0032786 | ENSOCUG00000008771, ENSOCUG00000011082, ENSOCUG00000016068, ENSOCUG00000011610, ENSOCUG00000011786, ENSOCUG00000026988                                          | 118 | 84  | 9777 | 5.918280872 | 5.535963 |
| GOTERM_BP_FAT | GO:0052547--regulation of peptidase activity                                | 6 | 3.2432 | 0.0209447 | ENSOCUG00000001230, ENSOCUG00000024304, ENSOCUG00000011786, ENSOCUG00000009566, ENSOCUG00000008779, ENSOCUG00000006405                                          | 118 | 132 | 9777 | 3.766178737 | 30.72476 |
| GOTERM_BP_FAT | GO:0001818--negative regulation of cytokine production                      | 6 | 3.2432 | 0.0228292 | ENSOCUG00000000786, ENSOCUG00000029153, ENSOCUG00000016131, ENSOCUG00000026334, ENSOCUG00000013593, ENSOCUG00000010998                                          | 118 | 135 | 9777 | 3.682485876 | 33.00119 |
| GOTERM_BP_FAT | GO:0050878--regulation of body fluid levels                                 | 6 | 3.2432 | 0.078926  | ENSOCUG00000001230, ENSOCUG00000016068, ENSOCUG00000014189, ENSOCUG00000012899, ENSOCUG00000006405, ENSOCUG00000013357                                          | 118 | 191 | 9777 | 2.602804153 | 75.9679  |
| GOTERM_BP_FAT | GO:0042060--wound healing                                                   | 6 | 3.2432 | 0.0993009 | ENSOCUG00000008771, ENSOCUG00000016068, ENSOCUG00000014189, ENSOCUG00000005107, ENSOCUG00000013357, ENSOCUG00000025956                                          | 118 | 205 | 9777 | 2.425051674 | 83.69515 |
| GOTERM_BP_FAT | GO:0002526--acute inflammatory response                                     | 5 | 2.7027 | 0.0031562 | ENSOCUG00000008771, ENSOCUG00000016131, ENSOCUG00000002424, ENSOCUG00000004625, ENSOCUG00000007545                                                              | 118 | 51  | 9777 | 8.123130608 | 5.334602 |
| GOTERM_BP_FAT | GO:0022404--molting cycle process                                           | 5 | 2.7027 | 0.0050264 | ENSOCUG00000016033, ENSOCUG00000029153, ENSOCUG00000012899, ENSOCUG00000013779, ENSOCUG00000029569                                                              | 118 | 58  | 9777 | 7.142752776 | 8.367796 |
| GOTERM_BP_FAT | GO:0001942--hair follicle development                                       | 5 | 2.7027 | 0.0050264 | ENSOCUG00000016033, ENSOCUG00000029153, ENSOCUG00000012899, ENSOCUG00000013779, ENSOCUG00000029569                                                              | 118 | 58  | 9777 | 7.142752776 | 8.367796 |
| GOTERM_BP_FAT | GO:0022405--hair cycle process                                              | 5 | 2.7027 | 0.0050264 | ENSOCUG00000016033, ENSOCUG00000029153, ENSOCUG00000012899, ENSOCUG00000013779, ENSOCUG00000029569                                                              | 118 | 58  | 9777 | 7.142752776 | 8.367796 |
| GOTERM_BP_FAT | GO:0098773--skin epidermis development                                      | 5 | 2.7027 | 0.0056726 | ENSOCUG00000016033, ENSOCUG00000029153, ENSOCUG00000012899, ENSOCUG00000013779, ENSOCUG00000029569                                                              | 118 | 60  | 9777 | 6.904661017 | 9.394416 |
| GOTERM_BP_FAT | GO:0042303--molting cycle                                                   | 5 | 2.7027 | 0.0067423 | ENSOCUG00000016033, ENSOCUG00000029153, ENSOCUG00000012899, ENSOCUG00000013779, ENSOCUG00000029569                                                              | 118 | 63  | 9777 | 6.575867635 | 11.0701  |
| GOTERM_BP_FAT | GO:0042633--hair cycle                                                      | 5 | 2.7027 | 0.0067423 | ENSOCUG00000016033, ENSOCUG00000029153, ENSOCUG00000012899, ENSOCUG00000013779, ENSOCUG00000029569                                                              | 118 | 63  | 9777 | 6.575867635 | 11.0701  |
| GOTERM_BP_FAT | GO:0007156--homophilic cell adhesion via plasma membrane adhesion molecules | 5 | 2.7027 | 0.0079379 | ENSOCUG00000012863, ENSOCUG0000006498, ENSOCUG00000029153, ENSOCUG00000010458, ENSOCUG00000012103                                                               | 118 | 66  | 9777 | 6.276964561 | 12.90841 |
| GOTERM_BP_FAT | GO:0098742--cell-cell adhesion via plasma-membrane adhesion molecules       | 5 | 2.7027 | 0.028828  | ENSOCUG00000012863, ENSOCUG0000006498, ENSOCUG00000029153, ENSOCUG00000010458, ENSOCUG00000012103                                                               | 118 | 97  | 9777 | 4.27092434  | 39.78723 |
| GOTERM_BP_FAT | GO:0045861--negative regulation of proteolysis                              | 5 | 2.7027 | 0.0297857 | ENSOCUG00000016068, ENSOCUG00000024304, ENSOCUG00000011786, ENSOCUG00000008779, ENSOCUG00000006405                                                              | 118 | 98  | 9777 | 4.22734348  | 40.80875 |
| GOTERM_BP_FAT | GO:0052548--regulation of endopeptidase activity                            | 5 | 2.7027 | 0.0672893 | ENSOCUG00000001230, ENSOCUG00000024304, ENSOCUG00000009566, ENSOCUG00000008779, ENSOCUG00000006405                                                              | 118 | 128 | 9777 | 3.236559852 | 70.1222  |
| GOTERM_BP_FAT | GO:0031667--response to nutrient levels                                     | 5 | 2.7027 | 0.0852165 | ENSOCUG00000024304, ENSOCUG00000004447, ENSOCUG00000017120, ENSOCUG00000012306, ENSOCUG00000014668                                                              | 118 | 139 | 9777 | 2.980429216 | 78.66082 |
| GOTERM_BP_FAT | GO:0031424--keratinization                                                  | 4 | 2.1622 | 5.52E-04  | ENSOCUG00000029153, ENSOCUG00000012899, ENSOCUG00000029569, ENSOCUG00000006405                                                                                  | 118 | 14  | 9777 | 23.67312349 | 0.953316 |
| GOTERM_BP_FAT | GO:0045684--positive regulation of epidermis development                    | 4 | 2.1622 | 0.0031703 | ENSOCUG00000012899, ENSOCUG00000013779, ENSOCUG00000029569, ENSOCUG00000006405                                                                                  | 118 | 25  | 9777 | 13.25694915 | 5.357769 |
| GOTERM_BP_FAT | GO:0010466--negative regulation of peptidase activity                       | 4 | 2.1622 | 0.0253659 | ENSOCUG00000024304, ENSOCUG00000011786, ENSOCUG00000008779, ENSOCUG00000006405                                                                                  | 118 | 53  | 9777 | 6.253277902 | 35.95428 |
| GOTERM_BP_FAT | GO:0001935--endothelial cell proliferation                                  | 4 | 2.1622 | 0.0477617 | ENSOCUG00000000786, ENSOCUG00000001230, ENSOCUG00000011610, ENSOCUG00000011786                                                                                  | 118 | 68  | 9777 | 4.873878365 | 57.20383 |
| GOTERM_BP_FAT | GO:0009266--response to temperature stimulus                                | 4 | 2.1622 | 0.0568193 | ENSOCUG00000008771, ENSOCUG00000014245, ENSOCUG00000011842, ENSOCUG00000029190                                                                                  | 118 | 73  | 9777 | 4.54005108  | 63.7405  |
| GOTERM_BP_FAT | GO:0032675--regulation of interleukin-6 production                          | 4 | 2.1622 | 0.060655  | ENSOCUG00000008771, ENSOCUG00000014998, ENSOCUG00000013593, ENSOCUG00000010998                                                                                  | 118 | 75  | 9777 | 4.418983051 | 66.21449 |
| GOTERM_BP_FAT | GO:0032635--interleukin-6 production                                        | 4 | 2.1622 | 0.0646091 | ENSOCUG00000008771, ENSOCUG00000014998, ENSOCUG00000013593, ENSOCUG00000010998                                                                                  | 118 | 77  | 9777 | 4.30420427  | 68.59783 |
| GOTERM_BP_FAT | GO:0050680--negative regulation of epithelial cell proliferation            | 4 | 2.1622 | 0.0838089 | ENSOCUG00000001230, ENSOCUG00000012774, ENSOCUG00000006405, ENSOCUG00000012306                                                                                  | 118 | 86  | 9777 | 3.853764289 | 78.08417 |

|               |                                                                                           |    |        |           |                                                                                                                                                                                                                                                                                                                                                                                                                                                                                                                                                                                                                                                                                                                                                                                                                                                                                                                                                                                                                                                                                                                                                                                                                                                                                                                                                                                                                                                                                                                                                       |     |      |      |             |          |
|---------------|-------------------------------------------------------------------------------------------|----|--------|-----------|-------------------------------------------------------------------------------------------------------------------------------------------------------------------------------------------------------------------------------------------------------------------------------------------------------------------------------------------------------------------------------------------------------------------------------------------------------------------------------------------------------------------------------------------------------------------------------------------------------------------------------------------------------------------------------------------------------------------------------------------------------------------------------------------------------------------------------------------------------------------------------------------------------------------------------------------------------------------------------------------------------------------------------------------------------------------------------------------------------------------------------------------------------------------------------------------------------------------------------------------------------------------------------------------------------------------------------------------------------------------------------------------------------------------------------------------------------------------------------------------------------------------------------------------------------|-----|------|------|-------------|----------|
| GOTERM_BP_FAT | GO:0043087--regulation of GTPase activity                                                 | 4  | 2.1622 | 0.090695  | ENSOCUG0000000786, ENSOCUG00000011082, ENSOCUG00000004691, ENSOCUG00000013357                                                                                                                                                                                                                                                                                                                                                                                                                                                                                                                                                                                                                                                                                                                                                                                                                                                                                                                                                                                                                                                                                                                                                                                                                                                                                                                                                                                                                                                                         | 118 | 89   | 9777 | 3.723862122 | 80.77187 |
| GOTERM_BP_FAT | GO:0002685--regulation of leukocyte migration                                             | 4  | 2.1622 | 0.0954133 | ENSOCUG00000008771, ENSOCUG00000016068, ENSOCUG00000011786, ENSOCUG00000002745                                                                                                                                                                                                                                                                                                                                                                                                                                                                                                                                                                                                                                                                                                                                                                                                                                                                                                                                                                                                                                                                                                                                                                                                                                                                                                                                                                                                                                                                        | 118 | 91   | 9777 | 3.642018998 | 82.43071 |
| GOTERM_BP_FAT | GO:2000505--regulation of energy homeostasis                                              | 3  | 1.6216 | 0.0072774 | ENSOCUG000000014245, ENSOCUG00000000737, ENSOCUG000000014668                                                                                                                                                                                                                                                                                                                                                                                                                                                                                                                                                                                                                                                                                                                                                                                                                                                                                                                                                                                                                                                                                                                                                                                                                                                                                                                                                                                                                                                                                          | 118 | 11   | 9777 | 22.59707242 | 11.89729 |
| GOTERM_BP_FAT | GO:0051797--regulation of hair follicle development                                       | 3  | 1.6216 | 0.0101608 | ENSOCUG000000029153, ENSOCUG000000013779, ENSOCUG000000029569                                                                                                                                                                                                                                                                                                                                                                                                                                                                                                                                                                                                                                                                                                                                                                                                                                                                                                                                                                                                                                                                                                                                                                                                                                                                                                                                                                                                                                                                                         | 118 | 13   | 9777 | 19.12059974 | 16.23135 |
| GOTERM_BP_FAT | GO:0050832--defense response to fungus                                                    | 3  | 1.6216 | 0.0101608 | ENSOCUG000000023796, ENSOCUG00000010998, ENSOCUG000000022646                                                                                                                                                                                                                                                                                                                                                                                                                                                                                                                                                                                                                                                                                                                                                                                                                                                                                                                                                                                                                                                                                                                                                                                                                                                                                                                                                                                                                                                                                          | 118 | 13   | 9777 | 19.12059974 | 16.23135 |
| GOTERM_BP_FAT | GO:0061436--establishment of skin barrier                                                 | 3  | 1.6216 | 0.0117623 | ENSOCUG00000012899, ENSOCUG00000006405, ENSOCUG00000013357                                                                                                                                                                                                                                                                                                                                                                                                                                                                                                                                                                                                                                                                                                                                                                                                                                                                                                                                                                                                                                                                                                                                                                                                                                                                                                                                                                                                                                                                                            | 118 | 14   | 9777 | 17.75484262 | 18.55086 |
| GOTERM_BP_FAT | GO:0033561--regulation of water loss via skin                                             | 3  | 1.6216 | 0.0134666 | ENSOCUG00000012899, ENSOCUG00000006405, ENSOCUG00000013357                                                                                                                                                                                                                                                                                                                                                                                                                                                                                                                                                                                                                                                                                                                                                                                                                                                                                                                                                                                                                                                                                                                                                                                                                                                                                                                                                                                                                                                                                            | 118 | 15   | 9777 | 16.57118644 | 20.95283 |
| GOTERM_BP_FAT | GO:0097009--energy homeostasis                                                            | 3  | 1.6216 | 0.0191705 | ENSOCUG00000014245, ENSOCUG00000000737, ENSOCUG00000014668                                                                                                                                                                                                                                                                                                                                                                                                                                                                                                                                                                                                                                                                                                                                                                                                                                                                                                                                                                                                                                                                                                                                                                                                                                                                                                                                                                                                                                                                                            | 118 | 18   | 9777 | 13.80932203 | 28.51516 |
| GOTERM_BP_FAT | GO:0042634--regulation of hair cycle                                                      | 3  | 1.6216 | 0.0191705 | ENSOCUG000000029153, ENSOCUG00000013779, ENSOCUG000000029569                                                                                                                                                                                                                                                                                                                                                                                                                                                                                                                                                                                                                                                                                                                                                                                                                                                                                                                                                                                                                                                                                                                                                                                                                                                                                                                                                                                                                                                                                          | 118 | 18   | 9777 | 13.80932203 | 28.51516 |
| GOTERM_BP_FAT | GO:0031069--hair follicle morphogenesis                                                   | 3  | 1.6216 | 0.0212603 | ENSOCUG00000016033, ENSOCUG00000012899, ENSOCUG000000029569                                                                                                                                                                                                                                                                                                                                                                                                                                                                                                                                                                                                                                                                                                                                                                                                                                                                                                                                                                                                                                                                                                                                                                                                                                                                                                                                                                                                                                                                                           | 118 | 19   | 9777 | 13.08251561 | 31.11102 |
| GOTERM_BP_FAT | GO:0009620--response to fungus                                                            | 3  | 1.6216 | 0.0234402 | ENSOCUG000000023796, ENSOCUG00000010998, ENSOCUG000000022646                                                                                                                                                                                                                                                                                                                                                                                                                                                                                                                                                                                                                                                                                                                                                                                                                                                                                                                                                                                                                                                                                                                                                                                                                                                                                                                                                                                                                                                                                          | 118 | 20   | 9777 | 12.42838983 | 33.72399 |
| GOTERM_BP_FAT | GO:0006953--acute-phase response                                                          | 3  | 1.6216 | 0.0257078 | ENSOCUG00000008771, ENSOCUG00000002424, ENSOCUG00000004625                                                                                                                                                                                                                                                                                                                                                                                                                                                                                                                                                                                                                                                                                                                                                                                                                                                                                                                                                                                                                                                                                                                                                                                                                                                                                                                                                                                                                                                                                            | 118 | 21   | 9777 | 11.83656174 | 36.3428  |
| GOTERM_BP_FAT | GO:0050829--defense response to Gram-negative bacterium                                   | 3  | 1.6216 | 0.0257078 | ENSOCUG00000016068, ENSOCUG00000015518, ENSOCUG00000013593                                                                                                                                                                                                                                                                                                                                                                                                                                                                                                                                                                                                                                                                                                                                                                                                                                                                                                                                                                                                                                                                                                                                                                                                                                                                                                                                                                                                                                                                                            | 118 | 21   | 9777 | 11.83656174 | 36.3428  |
| GOTERM_BP_FAT | GO:0048730--epidermis morphogenesis                                                       | 3  | 1.6216 | 0.0257078 | ENSOCUG00000016033, ENSOCUG00000012899, ENSOCUG000000029569                                                                                                                                                                                                                                                                                                                                                                                                                                                                                                                                                                                                                                                                                                                                                                                                                                                                                                                                                                                                                                                                                                                                                                                                                                                                                                                                                                                                                                                                                           | 118 | 21   | 9777 | 11.83656174 | 36.3428  |
| GOTERM_BP_FAT | GO:0018149--peptide cross-linking                                                         | 3  | 1.6216 | 0.0257078 | ENSOCUG000000025810, ENSOCUG00000001114, ENSOCUG00000014548                                                                                                                                                                                                                                                                                                                                                                                                                                                                                                                                                                                                                                                                                                                                                                                                                                                                                                                                                                                                                                                                                                                                                                                                                                                                                                                                                                                                                                                                                           | 118 | 21   | 9777 | 11.83656174 | 36.3428  |
| GOTERM_BP_FAT | GO:0019730--antimicrobial humoral response                                                | 3  | 1.6216 | 0.0356082 | ENSOCUG000000023796, ENSOCUG00000008779, ENSOCUG00000010998                                                                                                                                                                                                                                                                                                                                                                                                                                                                                                                                                                                                                                                                                                                                                                                                                                                                                                                                                                                                                                                                                                                                                                                                                                                                                                                                                                                                                                                                                           | 118 | 25   | 9777 | 9.942711864 | 46.67597 |
| GOTERM_BP_FAT | GO:0035082--axoneme assembly                                                              | 3  | 1.6216 | 0.0410248 | ENSOCUG00000007586, ENSOCUG00000006774, ENSOCUG00000009400                                                                                                                                                                                                                                                                                                                                                                                                                                                                                                                                                                                                                                                                                                                                                                                                                                                                                                                                                                                                                                                                                                                                                                                                                                                                                                                                                                                                                                                                                            | 118 | 27   | 9777 | 9.206214689 | 51.63831 |
| GOTERM_BP_FAT | GO:0050891--multicellular organismal water homeostasis                                    | 3  | 1.6216 | 0.0467293 | ENSOCUG00000012899, ENSOCUG00000006405, ENSOCUG00000013357                                                                                                                                                                                                                                                                                                                                                                                                                                                                                                                                                                                                                                                                                                                                                                                                                                                                                                                                                                                                                                                                                                                                                                                                                                                                                                                                                                                                                                                                                            | 118 | 29   | 9777 | 8.571303331 | 56.39207 |
| GOTERM_BP_FAT | GO:0030104--water homeostasis                                                             | 3  | 1.6216 | 0.05579   | ENSOCUG00000012899, ENSOCUG00000006405, ENSOCUG00000013357                                                                                                                                                                                                                                                                                                                                                                                                                                                                                                                                                                                                                                                                                                                                                                                                                                                                                                                                                                                                                                                                                                                                                                                                                                                                                                                                                                                                                                                                                            | 118 | 32   | 9777 | 7.767743644 | 63.04811 |
| GOTERM_BP_FAT | GO:0019217--regulation of fatty acid metabolic process                                    | 3  | 1.6216 | 0.0721053 | ENSOCUG00000017120, ENSOCUG00000006463, ENSOCUG00000000737                                                                                                                                                                                                                                                                                                                                                                                                                                                                                                                                                                                                                                                                                                                                                                                                                                                                                                                                                                                                                                                                                                                                                                                                                                                                                                                                                                                                                                                                                            | 118 | 37   | 9777 | 6.718048557 | 72.68769 |
| GOTERM_BP_FAT | GO:0050906--detection of stimulus involved in sensory perception                          | 3  | 1.6216 | 0.0934099 | ENSOCUG00000006275, ENSOCUG00000004459, ENSOCUG00000012584                                                                                                                                                                                                                                                                                                                                                                                                                                                                                                                                                                                                                                                                                                                                                                                                                                                                                                                                                                                                                                                                                                                                                                                                                                                                                                                                                                                                                                                                                            | 118 | 43   | 9777 | 5.780646433 | 81.74357 |
| GOTERM_BP_FAT | GO:0001895--retina homeostasis                                                            | 3  | 1.6216 | 0.0971204 | ENSOCUG00000029153, ENSOCUG00000006275, ENSOCUG00000023796                                                                                                                                                                                                                                                                                                                                                                                                                                                                                                                                                                                                                                                                                                                                                                                                                                                                                                                                                                                                                                                                                                                                                                                                                                                                                                                                                                                                                                                                                            | 118 | 44   | 9777 | 5.649268105 | 82.99691 |
| GOTERM_BP_FAT | GO:0001578--microtubule bundle formation                                                  | 3  | 1.6216 | 0.0971204 | ENSOCUG00000007586, ENSOCUG00000006774, ENSOCUG00000009400                                                                                                                                                                                                                                                                                                                                                                                                                                                                                                                                                                                                                                                                                                                                                                                                                                                                                                                                                                                                                                                                                                                                                                                                                                                                                                                                                                                                                                                                                            | 118 | 44   | 9777 | 5.649268105 | 82.99691 |
| GOTERM_BP_FAT | GO:0019732--antifungal humoral response                                                   | 2  | 1.0811 | 0.0237917 | ENSOCUG000000023796, ENSOCUG00000010998                                                                                                                                                                                                                                                                                                                                                                                                                                                                                                                                                                                                                                                                                                                                                                                                                                                                                                                                                                                                                                                                                                                                                                                                                                                                                                                                                                                                                                                                                                               | 118 | 2    | 9777 | 82.8559322  | 34.13653 |
| GOTERM_BP_FAT | GO:0090310--negative regulation of methylation-dependent chromatin silencing              | 2  | 1.0811 | 0.0354763 | ENSOCUG000000023739, ENSOCUG000000025736                                                                                                                                                                                                                                                                                                                                                                                                                                                                                                                                                                                                                                                                                                                                                                                                                                                                                                                                                                                                                                                                                                                                                                                                                                                                                                                                                                                                                                                                                                              | 118 | 3    | 9777 | 55.23728814 | 46.54936 |
| GOTERM_BP_FAT | GO:0045218--zonula adherens maintenance                                                   | 2  | 1.0811 | 0.0354763 | ENSOCUG000000022921, ENSOCUG00000017373                                                                                                                                                                                                                                                                                                                                                                                                                                                                                                                                                                                                                                                                                                                                                                                                                                                                                                                                                                                                                                                                                                                                                                                                                                                                                                                                                                                                                                                                                                               | 118 | 3    | 9777 | 55.23728814 | 46.54936 |
| GOTERM_BP_FAT | GO:2000507--positive regulation of energy homeostasis                                     | 2  | 1.0811 | 0.0470221 | ENSOCUG00000014245, ENSOCUG00000014668                                                                                                                                                                                                                                                                                                                                                                                                                                                                                                                                                                                                                                                                                                                                                                                                                                                                                                                                                                                                                                                                                                                                                                                                                                                                                                                                                                                                                                                                                                                | 118 | 4    | 9777 | 41.4279661  | 56.62377 |
| GOTERM_BP_FAT | GO:0001806--type IV hypersensitivity                                                      | 2  | 1.0811 | 0.0470221 | ENSOCUG00000016131, ENSOCUG00000007545                                                                                                                                                                                                                                                                                                                                                                                                                                                                                                                                                                                                                                                                                                                                                                                                                                                                                                                                                                                                                                                                                                                                                                                                                                                                                                                                                                                                                                                                                                                | 118 | 4    | 9777 | 41.4279661  | 56.62377 |
| GOTERM_BP_FAT | GO:0090308--regulation of methylation-dependent chromatin silencing                       | 2  | 1.0811 | 0.058431  | ENSOCUG000000023739, ENSOCUG000000025736                                                                                                                                                                                                                                                                                                                                                                                                                                                                                                                                                                                                                                                                                                                                                                                                                                                                                                                                                                                                                                                                                                                                                                                                                                                                                                                                                                                                                                                                                                              | 118 | 5    | 9777 | 33.14237288 | 64.8001  |
| GOTERM_BP_FAT | GO:0031936--negative regulation of chromatin silencing                                    | 2  | 1.0811 | 0.058431  | ENSOCUG000000023739, ENSOCUG000000025736                                                                                                                                                                                                                                                                                                                                                                                                                                                                                                                                                                                                                                                                                                                                                                                                                                                                                                                                                                                                                                                                                                                                                                                                                                                                                                                                                                                                                                                                                                              | 118 | 5    | 9777 | 33.14237288 | 64.8001  |
| GOTERM_BP_FAT | GO:0006032--chitin catabolic process                                                      | 2  | 1.0811 | 0.0697043 | ENSOCUG000000026988, ENSOCUG00000015772                                                                                                                                                                                                                                                                                                                                                                                                                                                                                                                                                                                                                                                                                                                                                                                                                                                                                                                                                                                                                                                                                                                                                                                                                                                                                                                                                                                                                                                                                                               | 118 | 6    | 9777 | 27.61864407 | 71.43582 |
| GOTERM_BP_FAT | GO:0006030--chitin metabolic process                                                      | 2  | 1.0811 | 0.0697043 | ENSOCUG000000026988, ENSOCUG00000015772                                                                                                                                                                                                                                                                                                                                                                                                                                                                                                                                                                                                                                                                                                                                                                                                                                                                                                                                                                                                                                                                                                                                                                                                                                                                                                                                                                                                                                                                                                               | 118 | 6    | 9777 | 27.61864407 | 71.43582 |
| GOTERM_BP_FAT | GO:0001580--detection of chemical stimulus involved in sensory perception of bitter taste | 2  | 1.0811 | 0.0697043 | ENSOCUG00000006275, ENSOCUG00000012584                                                                                                                                                                                                                                                                                                                                                                                                                                                                                                                                                                                                                                                                                                                                                                                                                                                                                                                                                                                                                                                                                                                                                                                                                                                                                                                                                                                                                                                                                                                | 118 | 6    | 9777 | 27.61864407 | 71.43582 |
| GOTERM_BP_FAT | GO:0050912--detection of chemical stimulus involved in sensory perception of taste        | 2  | 1.0811 | 0.0697043 | ENSOCUG00000006275, ENSOCUG00000012584                                                                                                                                                                                                                                                                                                                                                                                                                                                                                                                                                                                                                                                                                                                                                                                                                                                                                                                                                                                                                                                                                                                                                                                                                                                                                                                                                                                                                                                                                                                | 118 | 6    | 9777 | 27.61864407 | 71.43582 |
| GOTERM_BP_FAT | GO:0045217--cell-cell junction maintenance                                                | 2  | 1.0811 | 0.0697043 | ENSOCUG000000022921, ENSOCUG00000017373                                                                                                                                                                                                                                                                                                                                                                                                                                                                                                                                                                                                                                                                                                                                                                                                                                                                                                                                                                                                                                                                                                                                                                                                                                                                                                                                                                                                                                                                                                               | 118 | 6    | 9777 | 27.61864407 | 71.43582 |
| GOTERM_BP_FAT | GO:1901072--glucosamine-containing compound catabolic process                             | 2  | 1.0811 | 0.0808439 | ENSOCUG000000026988, ENSOCUG00000015772                                                                                                                                                                                                                                                                                                                                                                                                                                                                                                                                                                                                                                                                                                                                                                                                                                                                                                                                                                                                                                                                                                                                                                                                                                                                                                                                                                                                                                                                                                               | 118 | 7    | 9777 | 23.67312349 | 76.82111 |
| GOTERM_BP_FAT | GO:0034331--cell junction maintenance                                                     | 2  | 1.0811 | 0.0808439 | ENSOCUG000000022921, ENSOCUG00000017373                                                                                                                                                                                                                                                                                                                                                                                                                                                                                                                                                                                                                                                                                                                                                                                                                                                                                                                                                                                                                                                                                                                                                                                                                                                                                                                                                                                                                                                                                                               | 118 | 7    | 9777 | 23.67312349 | 76.82111 |
| GOTERM_BP_FAT | GO:0002524--hypersensitivity                                                              | 2  | 1.0811 | 0.0808439 | ENSOCUG00000016131, ENSOCUG00000007545                                                                                                                                                                                                                                                                                                                                                                                                                                                                                                                                                                                                                                                                                                                                                                                                                                                                                                                                                                                                                                                                                                                                                                                                                                                                                                                                                                                                                                                                                                                | 118 | 7    | 9777 | 23.67312349 | 76.82111 |
| GOTERM_BP_FAT | GO:0006346--methylation-dependent chromatin silencing                                     | 2  | 1.0811 | 0.0808439 | ENSOCUG000000023739, ENSOCUG000000025736                                                                                                                                                                                                                                                                                                                                                                                                                                                                                                                                                                                                                                                                                                                                                                                                                                                                                                                                                                                                                                                                                                                                                                                                                                                                                                                                                                                                                                                                                                              | 118 | 7    | 9777 | 23.67312349 | 76.82111 |
| GOTERM_BP_FAT | GO:0046348--amino sugar catabolic process                                                 | 2  | 1.0811 | 0.0808439 | ENSOCUG000000026988, ENSOCUG00000015772                                                                                                                                                                                                                                                                                                                                                                                                                                                                                                                                                                                                                                                                                                                                                                                                                                                                                                                                                                                                                                                                                                                                                                                                                                                                                                                                                                                                                                                                                                               | 118 | 7    | 9777 | 23.67312349 | 76.82111 |
| GOTERM_CC_FAT | GO:0005576--extracellular region                                                          | 74 | 40     | 2.0E-12   | ENSOCUG00000002371, ENSOCUG00000014548, ENSOCUG00000011842, ENSOCUG00000013593, ENSOCUG000000028107, ENSOCUG00000006275, ENSOCUG00000008947, ENSOCUG00000014012, ENSOCUG00000011610, ENSOCUG00000009566, ENSOCUG00000002424, ENSOCUG00000014245, ENSOCUG00000008779, ENSOCUG00000006463, ENSOCUG00000011658, ENSOCUG000000025956, ENSOCUG00000004918, ENSOCUG00000008771, ENSOCUG00000006498, ENSOCUG000000029281, ENSOCUG00000016068, ENSOCUG00000004691, ENSOCUG00000021242, ENSOCUG000000024096, ENSOCUG00000006494, ENSOCUG00000023796, ENSOCUG00000007730, ENSOCUG00000001054, ENSOCUG00000006405, ENSOCUG00000011731, ENSOCUG00000002341, ENSOCUG00000002745, ENSOCUG00000010912, ENSOCUG00000003467, ENSOCUG00000010917, ENSOCUG000000026988, ENSOCUG00000010998, ENSOCUG000000022646, ENSOCUG000000022335, ENSOCUG00000016033, ENSOCUG000000022549, ENSOCUG00000008818, ENSOCUG00000004447, ENSOCUG00000012103, ENSOCUG00000004625, ENSOCUG000000029278, ENSOCUG00000017421, ENSOCUG000000009148, ENSOCUG00000007488, ENSOCUG0000001114, ENSOCUG000000021361, ENSOCUG00000017373, ENSOCUG00000014998, ENSOCUG00000006251, ENSOCUG000000024745, ENSOCUG00000011323, ENSOCUG00000005202, ENSOCUG00000005634, ENSOCUG00000016132, ENSOCUG00000014227, ENSOCUG00000013200, ENSOCUG00000012584, ENSOCUG00000015371, ENSOCUG00000014485, ENSOCUG00000001230, ENSOCUG00000010529, ENSOCUG00000011786, ENSOCUG00000015518, ENSOCUG000000022624, ENSOCUG000000027050, ENSOCUG000000029569, ENSOCUG000000026264, ENSOCUG00000010425, ENSOCUG00000015772 | 118 | 2733 | 8802 | 2.019721297 | 2.57E-09 |

|               |                                      |    |        |          |                                                                                                                                                                                                                                                                                                                                                                                                                                                                                                                                                                                                                                                                                                                                                                                                                                                                                                                                                                                                                                                                                                                                                                                                                                                                                                                                                                                                                                 |     |      |      |             |          |
|---------------|--------------------------------------|----|--------|----------|---------------------------------------------------------------------------------------------------------------------------------------------------------------------------------------------------------------------------------------------------------------------------------------------------------------------------------------------------------------------------------------------------------------------------------------------------------------------------------------------------------------------------------------------------------------------------------------------------------------------------------------------------------------------------------------------------------------------------------------------------------------------------------------------------------------------------------------------------------------------------------------------------------------------------------------------------------------------------------------------------------------------------------------------------------------------------------------------------------------------------------------------------------------------------------------------------------------------------------------------------------------------------------------------------------------------------------------------------------------------------------------------------------------------------------|-----|------|------|-------------|----------|
| GOTERM_CC_FAT | GO:0044421~extracellular region part | 69 | 37.297 | 1.05E-11 | ENSOCUG0000002371, ENSOCUG00000014548, ENSOCUG00000011842, ENSOCUG00000013593, ENSOCUG00000006275, ENSOCUG00000008947, ENSOCUG00000014012, ENSOCUG00000011610, ENSOCUG00000009566, ENSOCUG00000002424, ENSOCUG00000014245, ENSOCUG00000008779, ENSOCUG00000006463, ENSOCUG00000011658, ENSOCUG00000025956, ENSOCUG00000004918, ENSOCUG00000008771, ENSOCUG00000006498, ENSOCUG00000029281, ENSOCUG00000016068, ENSOCUG00000004691, ENSOCUG00000021242, ENSOCUG00000024096, ENSOCUG00000006494, ENSOCUG00000023796, ENSOCUG00000007730, ENSOCUG0000001054, ENSOCUG00000006405, ENSOCUG00000011731, ENSOCUG00000002341, ENSOCUG00000002745, ENSOCUG00000003467, ENSOCUG00000010917, ENSOCUG00000026988, ENSOCUG00000010998, ENSOCUG00000022335, ENSOCUG00000016033, ENSOCUG00000008818, ENSOCUG00000004447, ENSOCUG00000012103, ENSOCUG00000029278, ENSOCUG00000004625, ENSOCUG00000017421, ENSOCUG00000009148, ENSOCUG00000007488, ENSOCUG00000011114, ENSOCUG00000021361, ENSOCUG00000017373, ENSOCUG00000014998, ENSOCUG00000006251, ENSOCUG00000024745, ENSOCUG00000011323, ENSOCUG00000005202, ENSOCUG00000005634, ENSOCUG00000016132, ENSOCUG00000014227, ENSOCUG00000013200, ENSOCUG00000012584, ENSOCUG00000015371, ENSOCUG00000014485, ENSOCUG0000001230, ENSOCUG00000010529, ENSOCUG00000011786, ENSOCUG00000022624, ENSOCUG00000027050, ENSOCUG00000029569, ENSOCUG00000026264, ENSOCUG00000010425, ENSOCUG00000015772 | 118 | 2487 | 8802 | 2.069534461 | 1.29E-08 |
| GOTERM_CC_FAT | GO:0031988~membrane-bounded vesicle  | 58 | 31.351 | 3.78E-08 | ENSOCUG00000002371, ENSOCUG00000014548, ENSOCUG00000011842, ENSOCUG00000013593, ENSOCUG00000006275, ENSOCUG00000008947, ENSOCUG00000014012, ENSOCUG00000011610, ENSOCUG00000009566, ENSOCUG00000014245, ENSOCUG00000008779, ENSOCUG00000025956, ENSOCUG00000011658, ENSOCUG00000004918, ENSOCUG00000006498, ENSOCUG00000016068, ENSOCUG00000004691, ENSOCUG00000021242, ENSOCUG00000006494, ENSOCUG00000024096, ENSOCUG00000023796, ENSOCUG00000026334, ENSOCUG00000007730, ENSOCUG00000006405, ENSOCUG0000001054, ENSOCUG00000011731, ENSOCUG0000002341, ENSOCUG00000002745, ENSOCUG00000003467, ENSOCUG00000010917, ENSOCUG00000026988, ENSOCUG00000004852, ENSOCUG00000004067, ENSOCUG00000008818, ENSOCUG00000004447, ENSOCUG00000012103, ENSOCUG00000029278, ENSOCUG00000017421, ENSOCUG00000007488, ENSOCUG00000001114, ENSOCUG00000021361, ENSOCUG00000017373, ENSOCUG00000006251, ENSOCUG00000024745, ENSOCUG00000011323, ENSOCUG00000005202, ENSOCUG00000005634, ENSOCUG00000016132, ENSOCUG00000014227, ENSOCUG00000013200, ENSOCUG00000012584, ENSOCUG00000015371, ENSOCUG00000011786, ENSOCUG00000015518, ENSOCUG00000022624, ENSOCUG00000029569, ENSOCUG00000010425, ENSOCUG00000026264                                                                                                                                                                                                                            | 118 | 2233 | 8802 | 1.937486243 | 4.68E-05 |
| GOTERM_CC_FAT | GO:0070062~extracellular exosome     | 53 | 28.649 | 2.60E-08 | ENSOCUG00000002371, ENSOCUG00000014548, ENSOCUG00000011842, ENSOCUG00000013593, ENSOCUG00000006275, ENSOCUG00000008947, ENSOCUG00000014012, ENSOCUG00000009566, ENSOCUG00000014245, ENSOCUG00000008779, ENSOCUG00000025956, ENSOCUG00000011658, ENSOCUG00000004918, ENSOCUG00000006498, ENSOCUG00000016068, ENSOCUG00000004691, ENSOCUG00000021242, ENSOCUG00000023796, ENSOCUG00000006494, ENSOCUG00000024096, ENSOCUG00000007730, ENSOCUG00000006405, ENSOCUG0000001054, ENSOCUG00000011731, ENSOCUG00000002341, ENSOCUG00000002745, ENSOCUG00000003467, ENSOCUG00000010917, ENSOCUG00000026988, ENSOCUG00000008818, ENSOCUG00000004447, ENSOCUG00000012103, ENSOCUG00000029278, ENSOCUG00000017421, ENSOCUG00000007488, ENSOCUG00000001114, ENSOCUG00000021361, ENSOCUG00000017373, ENSOCUG00000006251, ENSOCUG00000011323, ENSOCUG00000024745, ENSOCUG00000005202, ENSOCUG00000005634, ENSOCUG00000016132, ENSOCUG00000014227, ENSOCUG00000013200, ENSOCUG00000012584, ENSOCUG00000015371, ENSOCUG00000011786, ENSOCUG00000022624, ENSOCUG00000029569, ENSOCUG00000010425, ENSOCUG00000026264                                                                                                                                                                                                                                                                                                                               | 118 | 1907 | 8802 | 2.073120439 | 3.22E-05 |
| GOTERM_CC_FAT | GO:1903561~extracellular vesicle     | 53 | 28.649 | 3.13E-08 | ENSOCUG00000002371, ENSOCUG00000014548, ENSOCUG00000011842, ENSOCUG00000013593, ENSOCUG00000006275, ENSOCUG00000008947, ENSOCUG00000014012, ENSOCUG00000009566, ENSOCUG00000014245, ENSOCUG00000008779, ENSOCUG00000025956, ENSOCUG00000011658, ENSOCUG00000004918, ENSOCUG00000006498, ENSOCUG00000016068, ENSOCUG00000004691, ENSOCUG00000021242, ENSOCUG00000023796, ENSOCUG00000006494, ENSOCUG00000024096, ENSOCUG00000007730, ENSOCUG00000006405, ENSOCUG0000001054, ENSOCUG00000011731, ENSOCUG00000002341, ENSOCUG00000002745, ENSOCUG00000003467, ENSOCUG00000010917, ENSOCUG00000026988, ENSOCUG00000008818, ENSOCUG00000004447, ENSOCUG00000012103, ENSOCUG00000029278, ENSOCUG00000017421, ENSOCUG00000007488, ENSOCUG00000001114, ENSOCUG00000021361, ENSOCUG00000017373, ENSOCUG00000006251, ENSOCUG00000011323, ENSOCUG00000024745, ENSOCUG00000005202, ENSOCUG00000005634, ENSOCUG00000016132, ENSOCUG00000014227, ENSOCUG00000013200, ENSOCUG00000012584, ENSOCUG00000015371, ENSOCUG00000011786, ENSOCUG00000022624, ENSOCUG00000029569, ENSOCUG00000010425, ENSOCUG00000026264                                                                                                                                                                                                                                                                                                                               | 118 | 1917 | 8802 | 2.06230604  | 3.87E-05 |

|               |                                                                                                                            |    |        |           |                                                                                                                                                                                                                                                                                                                                                                                                                                                                                                                                                                                                                                                                                                                                                                                                                                                                                                                                                                                                                                                                                                   |     |      |      |             |          |
|---------------|----------------------------------------------------------------------------------------------------------------------------|----|--------|-----------|---------------------------------------------------------------------------------------------------------------------------------------------------------------------------------------------------------------------------------------------------------------------------------------------------------------------------------------------------------------------------------------------------------------------------------------------------------------------------------------------------------------------------------------------------------------------------------------------------------------------------------------------------------------------------------------------------------------------------------------------------------------------------------------------------------------------------------------------------------------------------------------------------------------------------------------------------------------------------------------------------------------------------------------------------------------------------------------------------|-----|------|------|-------------|----------|
| GOTERM_CC_FAT | GO:0043230~extracellular organelle                                                                                         | 53 | 28.649 | 3.19E-08  | ENSOCUG0000002371, ENSOCUG00000014548, ENSOCUG00000011842, ENSOCUG00000013593, ENSOCUG00000006275, ENSOCUG00000008947, ENSOCUG00000014012, ENSOCUG00000009566, ENSOCUG00000014245, ENSOCUG00000008779, ENSOCUG00000025956, ENSOCUG00000011658, ENSOCUG00000004918, ENSOCUG00000006498, ENSOCUG00000016068, ENSOCUG00000004691, ENSOCUG00000021242, ENSOCUG00000023796, ENSOCUG00000006494, ENSOCUG00000024096, ENSOCUG00000007730, ENSOCUG00000006405, ENSOCUG00000011054, ENSOCUG00000011731, ENSOCUG00000002341, ENSOCUG00000002745, ENSOCUG00000003467, ENSOCUG00000010917, ENSOCUG00000026988, ENSOCUG00000008818, ENSOCUG00000004447, ENSOCUG00000012103, ENSOCUG00000029278, ENSOCUG00000017421, ENSOCUG00000007488, ENSOCUG00000001114, ENSOCUG00000021361, ENSOCUG00000017373, ENSOCUG00000006251, ENSOCUG00000011323, ENSOCUG00000024745, ENSOCUG00000005202, ENSOCUG00000005634, ENSOCUG00000016132, ENSOCUG00000014227, ENSOCUG00000013200, ENSOCUG00000012584, ENSOCUG00000015371, ENSOCUG00000011786, ENSOCUG00000022624, ENSOCUG00000029569, ENSOCUG00000010425, ENSOCUG00000026264 | 118 | 1918 | 8802 | 2.061230802 | 3.95E-05 |
| GOTERM_CC_FAT | GO:0005615~extracellular space                                                                                             | 31 | 16.757 | 1.13E-08  | ENSOCUG00000008818, ENSOCUG00000013593, ENSOCUG00000004625, ENSOCUG00000029278, ENSOCUG00000009148, ENSOCUG00000006275, ENSOCUG00000014012, ENSOCUG00000011610, ENSOCUG00000009566, ENSOCUG0000002424, ENSOCUG00000014245, ENSOCUG00000014998, ENSOCUG00000006463, ENSOCUG00000029281, ENSOCUG00000008771, ENSOCUG00000005202, ENSOCUG00000016068, ENSOCUG00000023796, ENSOCUG00000011731, ENSOCUG00000014485, ENSOCUG00000015371, ENSOCUG00000012584, ENSOCUG0000001230, ENSOCUG00000010529, ENSOCUG00000011786, ENSOCUG00000026988, ENSOCUG00000027050, ENSOCUG00000026264, ENSOCUG00000015772, ENSOCUG00000010998, ENSOCUG00000022335                                                                                                                                                                                                                                                                                                                                                                                                                                                          | 118 | 724  | 8802 | 3.193908606 | 1.40E-05 |
| GOTERM_CC_FAT | GO:0030054~cell junction                                                                                                   | 17 | 9.1892 | 0.0089411 | ENSOCUG00000000786, ENSOCUG00000006498, ENSOCUG00000021242, ENSOCUG00000003831, ENSOCUG00000010458, ENSOCUG00000012103, ENSOCUG00000004459, ENSOCUG00000014485, ENSOCUG00000002745, ENSOCUG00000010156, ENSOCUG00000029153, ENSOCUG00000007002, ENSOCUG00000022921, ENSOCUG00000021361, ENSOCUG00000017373, ENSOCUG00000025956, ENSOCUG00000004918                                                                                                                                                                                                                                                                                                                                                                                                                                                                                                                                                                                                                                                                                                                                                | 118 | 630  | 8802 | 2.01283293  | 10.5269  |
| GOTERM_CC_FAT | GO:0045111~intermediate filament cytoskeleton                                                                              | 10 | 5.4054 | 2.89E-05  | ENSOCUG00000017421, ENSOCUG00000013920, ENSOCUG00000016132, ENSOCUG00000014548, ENSOCUG00000021297, ENSOCUG00000017694, ENSOCUG00000012774, ENSOCUG00000029569, ENSOCUG00000011731, ENSOCUG00000029278                                                                                                                                                                                                                                                                                                                                                                                                                                                                                                                                                                                                                                                                                                                                                                                                                                                                                            | 118 | 120  | 8802 | 6.216101695 | 0.035821 |
| GOTERM_CC_FAT | GO:0070161~anchoring junction                                                                                              | 10 | 5.4054 | 0.0283404 | ENSOCUG00000000786, ENSOCUG00000029153, ENSOCUG00000021242, ENSOCUG00000022921, ENSOCUG00000021361, ENSOCUG00000017373, ENSOCUG00000010458, ENSOCUG00000012103, ENSOCUG00000025956, ENSOCUG00000004918                                                                                                                                                                                                                                                                                                                                                                                                                                                                                                                                                                                                                                                                                                                                                                                                                                                                                            | 118 | 324  | 8802 | 2.302259887 | 29.95717 |
| GOTERM_CC_FAT | GO:0005911~cell-cell junction                                                                                              | 9  | 4.8649 | 0.0188958 | ENSOCUG00000006498, ENSOCUG00000010156, ENSOCUG00000029153, ENSOCUG00000021242, ENSOCUG00000007002, ENSOCUG00000022921, ENSOCUG00000017373, ENSOCUG00000010458, ENSOCUG00000012103                                                                                                                                                                                                                                                                                                                                                                                                                                                                                                                                                                                                                                                                                                                                                                                                                                                                                                                | 118 | 252  | 8802 | 2.664043584 | 21.0426  |
| GOTERM_CC_FAT | GO:0005912~adherens junction                                                                                               | 9  | 4.8649 | 0.0557547 | ENSOCUG00000000786, ENSOCUG00000029153, ENSOCUG00000022921, ENSOCUG00000021361, ENSOCUG00000017373, ENSOCUG00000010458, ENSOCUG00000012103, ENSOCUG00000025956, ENSOCUG00000004918                                                                                                                                                                                                                                                                                                                                                                                                                                                                                                                                                                                                                                                                                                                                                                                                                                                                                                                | 118 | 312  | 8802 | 2.15172751  | 50.8608  |
| GOTERM_CC_FAT | GO:0005882~intermediate filament (keratins)                                                                                | 8  | 4.3243 | 1.49E-04  | ENSOCUG00000017421, ENSOCUG00000013920, ENSOCUG00000016132, ENSOCUG00000017694, ENSOCUG00000012774, ENSOCUG00000029569, ENSOCUG00000011731, ENSOCUG00000029278                                                                                                                                                                                                                                                                                                                                                                                                                                                                                                                                                                                                                                                                                                                                                                                                                                                                                                                                    | 118 | 87   | 8802 | 6.859146698 | 0.184079 |
| GOTERM_CC_FAT | GO:0005913~cell-cell adherens junction                                                                                     | 5  | 2.7027 | 6.22E-04  | ENSOCUG00000029153, ENSOCUG00000022921, ENSOCUG00000017373, ENSOCUG00000010458, ENSOCUG00000012103                                                                                                                                                                                                                                                                                                                                                                                                                                                                                                                                                                                                                                                                                                                                                                                                                                                                                                                                                                                                | 118 | 30   | 8802 | 12.43220339 | 0.767871 |
| GOTERM_CC_FAT | GO:0045095~keratin filament                                                                                                | 4  | 2.1622 | 0.0085753 | ENSOCUG00000017421, ENSOCUG00000013920, ENSOCUG00000012774, ENSOCUG00000029278                                                                                                                                                                                                                                                                                                                                                                                                                                                                                                                                                                                                                                                                                                                                                                                                                                                                                                                                                                                                                    | 118 | 32   | 8802 | 9.324152542 | 10.11708 |
| GOTERM_CC_FAT | GO:0044447~axoneme part                                                                                                    | 3  | 1.6216 | 0.008909  | ENSOCUG00000010057, ENSOCUG00000007586, ENSOCUG00000009400                                                                                                                                                                                                                                                                                                                                                                                                                                                                                                                                                                                                                                                                                                                                                                                                                                                                                                                                                                                                                                        | 118 | 11   | 8802 | 20.34360555 | 10.49111 |
| GOTERM_CC_FAT | GO:0030286~dynein complex                                                                                                  | 3  | 1.6216 | 0.0529051 | ENSOCUG00000006833, ENSOCUG00000010057, ENSOCUG00000009400                                                                                                                                                                                                                                                                                                                                                                                                                                                                                                                                                                                                                                                                                                                                                                                                                                                                                                                                                                                                                                        | 118 | 28   | 8802 | 7.992130751 | 48.99229 |
| GOTERM_CC_FAT | GO:0005858~axonemal dynein complex                                                                                         | 2  | 1.0811 | 0.077172  | ENSOCUG00000010057, ENSOCUG00000009400                                                                                                                                                                                                                                                                                                                                                                                                                                                                                                                                                                                                                                                                                                                                                                                                                                                                                                                                                                                                                                                            | 118 | 6    | 8802 | 24.86440678 | 63.01514 |
| GOTERM_CC_FAT | GO:0005915~zonula adherens                                                                                                 | 2  | 1.0811 | 0.077172  | ENSOCUG00000022921, ENSOCUG00000017373                                                                                                                                                                                                                                                                                                                                                                                                                                                                                                                                                                                                                                                                                                                                                                                                                                                                                                                                                                                                                                                            | 118 | 6    | 8802 | 24.86440678 | 63.01514 |
| GOTERM_CC_FAT | GO:0001533~cornified envelope                                                                                              | 2  | 1.0811 | 0.089447  | ENSOCUG00000014548, ENSOCUG00000006494                                                                                                                                                                                                                                                                                                                                                                                                                                                                                                                                                                                                                                                                                                                                                                                                                                                                                                                                                                                                                                                            | 118 | 7    | 8802 | 21.31234867 | 68.6672  |
| GOTERM_MF_FAT | GO:0005509~calcium ion binding                                                                                             | 13 | 7.027  | 0.0026924 | ENSOCUG00000012863, ENSOCUG00000006498, ENSOCUG00000005202, ENSOCUG00000014189, ENSOCUG00000024096, ENSOCUG00000011842, ENSOCUG00000012103, ENSOCUG00000002745, ENSOCUG00000022645, ENSOCUG00000029153, ENSOCUG0000001114, ENSOCUG00000009566, ENSOCUG00000022646                                                                                                                                                                                                                                                                                                                                                                                                                                                                                                                                                                                                                                                                                                                                                                                                                                 | 106 | 449  | 9935 | 2.713682397 | 3.533253 |
| GOTERM_MF_FAT | GO:0005198~structural molecule activity                                                                                    | 12 | 6.4865 | 0.0027963 | ENSOCUG00000017421, ENSOCUG00000013920, ENSOCUG00000007002, ENSOCUG00000016132, ENSOCUG00000014548, ENSOCUG00000017694, ENSOCUG00000027112, ENSOCUG00000012774, ENSOCUG00000029569, ENSOCUG00000011731, ENSOCUG00000014485, ENSOCUG00000029278                                                                                                                                                                                                                                                                                                                                                                                                                                                                                                                                                                                                                                                                                                                                                                                                                                                    | 106 | 392  | 9935 | 2.869175972 | 3.667289 |
| GOTERM_MF_FAT | GO:0098772~molecular function regulator                                                                                    | 12 | 6.4865 | 0.084792  | ENSOCUG00000022645, ENSOCUG00000016068, ENSOCUG00000017253, ENSOCUG00000024304, ENSOCUG00000023796, ENSOCUG00000014012, ENSOCUG00000011610, ENSOCUG00000023409, ENSOCUG00000008779, ENSOCUG00000012306, ENSOCUG00000015371, ENSOCUG00000006463                                                                                                                                                                                                                                                                                                                                                                                                                                                                                                                                                                                                                                                                                                                                                                                                                                                    | 106 | 655  | 9935 | 1.717125162 | 69.33971 |
| GOTERM_MF_FAT | GO:0004857~enzyme inhibitor activity                                                                                       | 6  | 3.2432 | 0.0318169 | ENSOCUG00000016068, ENSOCUG00000014012, ENSOCUG00000008779, ENSOCUG00000012306, ENSOCUG00000015371, ENSOCUG00000006463                                                                                                                                                                                                                                                                                                                                                                                                                                                                                                                                                                                                                                                                                                                                                                                                                                                                                                                                                                            | 106 | 167  | 9935 | 3.367416111 | 35.04128 |
| GOTERM_MF_FAT | GO:0001228~transcriptional activator activity, RNA polymerase II transcription regulatory region sequence-specific binding | 6  | 3.2432 | 0.0809425 | ENSOCUG00000005775, ENSOCUG00000004386, ENSOCUG00000017717, ENSOCUG00000015184, ENSOCUG00000013357, ENSOCUG00000000737                                                                                                                                                                                                                                                                                                                                                                                                                                                                                                                                                                                                                                                                                                                                                                                                                                                                                                                                                                            | 106 | 218  | 9935 | 2.579626104 | 67.57365 |

|               |                                                                                                                                                                                                         |   |        |           |                                                                                                     |     |     |      |             |          |
|---------------|---------------------------------------------------------------------------------------------------------------------------------------------------------------------------------------------------------|---|--------|-----------|-----------------------------------------------------------------------------------------------------|-----|-----|------|-------------|----------|
| GOTERM_MF_FAT | GO:0005506--iron ion binding                                                                                                                                                                            | 5 | 2.7027 | 0.0701013 | ENSOCUG00000023380, ENSOCUG00000001230, ENSOCUG00000011201, ENSOCUG000000023796, ENSOCUG00000004655 | 106 | 147 | 9935 | 3.187973303 | 62.08151 |
| GOTERM_MF_FAT | GO:0001077--transcriptional activator activity, RNA polymerase II core promoter proximal region sequence-specific binding                                                                               | 5 | 2.7027 | 0.0846018 | ENSOCUG00000005775, ENSOCUG00000004386, ENSOCUG00000017717, ENSOCUG000000015184, ENSOCUG00000000737 | 106 | 157 | 9935 | 2.984917678 | 69.25459 |
| GOTERM_MF_FAT | GO:0004866--endopeptidase inhibitor activity                                                                                                                                                            | 4 | 2.1622 | 0.066104  | ENSOCUG00000016068, ENSOCUG00000014012, ENSOCUG00000008779, ENSOCUG00000015371                      | 106 | 88  | 9935 | 4.260291595 | 59.84804 |
| GOTERM_MF_FAT | GO:0030414--peptidase inhibitor activity                                                                                                                                                                | 4 | 2.1622 | 0.0697277 | ENSOCUG00000016068, ENSOCUG00000014012, ENSOCUG00000008779, ENSOCUG00000015371                      | 106 | 90  | 9935 | 4.165618449 | 61.8777  |
| GOTERM_MF_FAT | GO:0061135--endopeptidase regulator activity                                                                                                                                                            | 4 | 2.1622 | 0.0734398 | ENSOCUG00000016068, ENSOCUG00000014012, ENSOCUG00000008779, ENSOCUG00000015371                      | 106 | 92  | 9935 | 4.075061526 | 63.85816 |
| GOTERM_MF_FAT | GO:0005003--ephrin receptor activity                                                                                                                                                                    | 3 | 1.6216 | 0.0068148 | ENSOCUG0000000786, ENSOCUG00000011082, ENSOCUG00000007545                                           | 106 | 12  | 9935 | 23.43160377 | 8.720015 |
| GOTERM_MF_FAT | GO:0031490--chromatin DNA binding                                                                                                                                                                       | 3 | 1.6216 | 0.0498542 | ENSOCUG00000017717, ENSOCUG00000013357, ENSOCUG00000014668                                          | 106 | 34  | 9935 | 8.269977802 | 49.45644 |
| GOTERM_MF_FAT | GO:0016712--oxidoreductase activity, acting on paired donors, with incorporation or reduction of molecular oxygen, reduced flavin or flavoprotein as one donor, and incorporation of one atom of oxygen | 3 | 1.6216 | 0.0498542 | ENSOCUG00000023380, ENSOCUG00000011201, ENSOCUG00000004655                                          | 106 | 34  | 9935 | 8.269977802 | 49.45644 |
| GOTERM_MF_FAT | GO:0004867--serine-type endopeptidase inhibitor activity                                                                                                                                                | 3 | 1.6216 | 0.0695138 | ENSOCUG00000016068, ENSOCUG00000008779, ENSOCUG00000015371                                          | 106 | 41  | 9935 | 6.858030373 | 61.76057 |
| GOTERM_MF_FAT | GO:0004714--transmembrane receptor protein tyrosine kinase activity                                                                                                                                     | 3 | 1.6216 | 0.0755294 | ENSOCUG0000000786, ENSOCUG00000011082, ENSOCUG00000007545                                           | 106 | 43  | 9935 | 6.539052216 | 64.93066 |
| GOTERM_MF_FAT | GO:0008061--chitin binding                                                                                                                                                                              | 2 | 1.0811 | 0.0416155 | ENSOCUG00000026988, ENSOCUG00000015772                                                              | 106 | 4   | 9935 | 46.86320755 | 43.28554 |
| GOTERM_MF_FAT | GO:0004568--chitinase activity                                                                                                                                                                          | 2 | 1.0811 | 0.0617753 | ENSOCUG00000026988, ENSOCUG00000015772                                                              | 106 | 6   | 9935 | 31.24213836 | 57.29258 |
| GOTERM_MF_FAT | GO:0003810--protein-glutamine gamma-glutamyltransferase activity                                                                                                                                        | 2 | 1.0811 | 0.0716971 | ENSOCUG00000025810, ENSOCUG0000001114                                                               | 106 | 7   | 9935 | 26.77897574 | 62.94057 |
| KEGG_PATHWAY  | ocu04514:Cell adhesion molecules (CAMs)                                                                                                                                                                 | 4 | 2.1622 | 0.0730994 | ENSOCUG00000029153, ENSOCUG00000007002, ENSOCUG00000010458, ENSOCUG00000025956                      | 51  | 143 | 7342 | 4.026875086 | 58.48335 |
| KEGG_PATHWAY  | ocu04115:p53 signaling pathway                                                                                                                                                                          | 3 | 1.6216 | 0.08804   | ENSOCUG00000016068, ENSOCUG00000006405, ENSOCUG00000004238                                          | 51  | 73  | 7342 | 5.916196616 | 65.60516 |
